# Supplementary material for: Mapping the FF domain folding pathway via structures of transiently populated folding intermediates
Source: PubMed Central journal article supplement (PMC11648910; doi:10.1073/pnas.2416682121), 2024-12-04
Supplement: pnas.2416682121.sapp.pdf [file pnas.2416682121.sapp.pdf]

## Supporting Information

### Mapping the FF domain folding pathway via structures of transiently populated folding intermediates

**This PDF file includes:**

Supplementary text

Figures S1 to S7

Tables S1 to S4

Legend for supplementary file A17GFF\_I2\_lowest10.pdb.

SI References

## Chemical Exchange Saturation Transfer

Consider a simple two-state reaction,  $F \rightleftharpoons U$ , where states F and U are in slow exchange on the NMR chemical shift timescale, with  $p_F \gg p_U$  (1). A set of spectra is acquired with a weak radio frequency ( $B_1$ ) pulse applied at a given frequency for an exchange time,  $T_{EX}$  (one spectrum for each position of the  $B_1$  field), and the effect of the  $B_1$  irradiation on the ‘visible’ major state spectrum is monitored (2-4). A plot of the normalised intensity of a peak derived from the visible (F) state ( $I/I_0$ ) vs  $\omega_{RF}$  will have two dips, one at the chemical shift (ppm) of the major state,  $\omega_F$ , and, importantly, one at the chemical shift of the minor state  $\omega_U$ . Here  $\omega_{RF}$  is the offset (ppm) at which the  $B_1$  field is applied. The exchange parameters ( $k_{ex,FU}$ ,  $p_U$ ), major/minor state chemical shifts, major state longitudinal relaxation rate, and major and minor state transverse-relaxation rates can all be obtained by analysing CEST profiles recorded with two different  $B_1$  values (5, 6). Exchange occurring at rates spanning the  $\sim 10$  to  $\sim 10,000$  s<sup>-1</sup> range can be studied using amide <sup>15</sup>N CEST experiments, although as exchange becomes fast only a single dip will be observed in each CEST profile at a frequency of  $\sim \omega_F$ , and its shape could be asymmetric – slightly tilted towards the position of the minor state (6-9). Interestingly, introduction of a third state I that is in rapid exchange with U,  $F \rightleftharpoons I \rightleftharpoons U$  such that  $p_F \gg p_U \gg p_I$  and  $k_{ex,IU} \gg k_{ex,FI}$  results in a CEST intensity profile with two dips, one corresponding to state F and one arising largely from state U, but with the minor U state dip broadened and moved from  $\omega_U$  towards  $\omega_I$  (Fig. S1). Recently we have shown that the broadening of the ‘U’ state dip can be used to detect other minor states, such as I in this example, that otherwise would have escaped detection by other methods (10, 11).

## Materials and Methods

**NMR Samples.** Isotopically enriched A17G FF and A17G S56P FF domains were overexpressed in *E coli* BL21(DE3) cells transformed with the appropriate plasmid and grown in the appropriate M9 media (12, 13). As all the samples used in this study were uniformly <sup>15</sup>N enriched, the M9 media used to grow the cells consisted of 1g/L <sup>15</sup>NH<sub>4</sub>Cl as the sole nitrogen source. To prepare [U-<sup>15</sup>N] labelled protein 5 g/L of glucose was added as the sole carbon source. [U-<sup>15</sup>N, <sup>13</sup>C] labelled protein was expressed in cells grown in M9 media consisting of 3 g/L of [<sup>13</sup>C<sub>6</sub>] glucose as the sole carbon source. [U-<sup>15</sup>N], <sup>13</sup>C<sup>α</sup> labelled protein was expressed in cells grown in M9 media consisting of 3 g/L of [2-<sup>13</sup>C] glucose as the sole carbon source (12, 14). [U-<sup>15</sup>N, <sup>13</sup>C] 50% <sup>2</sup>H labelled protein was expressed in cells grown in 60% D<sub>2</sub>O M9 media with 3 g/L of [<sup>13</sup>C<sub>6</sub>] glucose as the sole carbon source (15, 16). The NOESY experiments described in the text were measured on a sample that is [U-<sup>15</sup>N, <sup>13</sup>C] enriched everywhere except for the side-chains of Ile, Leu and Val that are [Ileδ1 - <sup>13</sup>CH<sub>3</sub>, <sup>2</sup>H; Leu, Val - <sup>13</sup>CH<sub>3</sub>/<sup>12</sup>CD<sub>3</sub>, <sup>2</sup>H]. This sample was prepared by growing cells initially in M9 media with 3 g/L of [<sup>13</sup>C<sub>6</sub>] glucose as the sole carbon source. One hour prior to induction of protein expression 50 mg/L 2-keto-3-d<sub>2</sub>-4-<sup>13</sup>C butyrate and 100 mg/L 2-keto-3-methyl-d<sub>3</sub>-3-d<sub>1</sub>-4-<sup>13</sup>C-butyrates were added to the media (13). The overexpressed protein with the desired labelling was purified

from the *E coli* cells using a two-step procedure consisting of a cation exchange chromatography step followed by a size exclusion chromatography step, as described previously (16).

**NMR Samples.** See *SI Appendix*, Table S1 for a list of all samples used in the present study.

**NMR Experiments.** All CEST and NOESY experiments were recorded on a 700 MHz Bruker Avance III HD spectrometer equipped with a triple-resonance cryogenically cooled probe with a Z axis gradient. The assignment experiments were performed on a 500 MHz Bruker NEO spectrometer equipped with a room temperature triple resonance Z-gradient probe.

In this study we have used CEST rather than CPMG experiments to obtain  $\overline{\omega}_{I2}$  values because i)  $^{13}\text{C}$  CEST experiments can be performed using uniformly  $^{13}\text{C}$  enriched samples (17, 18), unlike the case for CPMG studies (12, 14), resulting in a more extensive set of I2 state chemical shifts, ii) accurate exchange parameters can be obtained from CEST experiments performed at a single  $B_0$  field (4, 5) and iii)  $\overline{\omega}_{I2}$  values are directly obtained from the analysis of CEST profiles, while only the absolute value of  $\Delta\overline{\omega}$  ( $|\Delta\overline{\omega}|$ ) is available from the analysis of CPMG data. Thus, additional experiments, sometimes at multiple  $B_0$  field strengths, must be performed to obtain the sign of  $\Delta\overline{\omega}$  and reconstruct the minor state spectrum from CPMG data (19-21).

All CEST experiments were carried out in a pseudo 3D manner ( $B_1$  offset in the third dimension), with CEST profiles generated by quantifying peak intensities from two-dimensional correlation maps. Amide  $^{15}\text{N}$   $\overline{\omega}_{I2}$  shifts were obtained from  $^{15}\text{N}$  CEST datasets recorded on a  $[\text{U-}^{15}\text{N}, ^{13}\text{C}]$  A17G FF sample (sample 1; *SI Appendix*, Table S1) using the standard  $^{15}\text{N}$  CEST experiment (4). Amide  $^1\text{H}^{\text{N}}$   $\overline{\omega}_{I2}$  shifts were obtained by recording  $^1\text{H}^{\text{N}}$  CEST datasets with suppression of NOE-based dips (22, 23) ( $[\text{U-}^{15}\text{N}, ^{13}\text{C}]$  A17G FF sample; sample 1).  $^{13}\text{C}^{\text{O}}$   $\overline{\omega}_{I2}$  shifts were obtained from  $^{13}\text{C}^{\text{O}}$  CEST datasets recorded on a  $[\text{U-}^{15}\text{N}, ^{13}\text{C}]$  A17G FF sample (sample 1), either using HN(CO)-type or H(N)CO-type sequences in which CEST profiles were obtained by quantifying intensities from  $^{15}\text{N-}^1\text{H}^{\text{N}}$  or  $^{13}\text{C}^{\text{O}}(\text{i-1})\text{-}^1\text{H}^{\text{N}}(\text{i})$  correlation maps, respectively (24).  $^{13}\text{C}^{\alpha}$   $\overline{\omega}_{I2}$  shifts were measured using four different CEST-based experiments: i)  $^{13}\text{C}^{\alpha}$  CEST via an (HACACO)NH scheme recorded on a  $[\text{U-}^{15}\text{N}, ^{13}\text{C}]$  A17G FF sample (sample 1), with peak intensities quantified from  $^{15}\text{N-}^1\text{H}^{\text{N}}$  correlation maps (25); ii)  $^{13}\text{C}^{\alpha}$  CEST based on quantification of CT- $^{13}\text{C}^{\alpha}\text{-}^1\text{H}^{\alpha}$  correlation maps (17) and recorded on a 100%  $\text{D}_2\text{O}$   $[\text{U-}^{15}\text{N}, ^{13}\text{C}]$  A17G FF sample (sample 2); iii)  $^{13}\text{C}^{\alpha}$  CEST using a 100%  $\text{D}_2\text{O}$   $[\text{U-}^{15}\text{N}]$   $^{13}\text{C}^{\alpha}$  A17G FF sample (sample 3), with peak quantification from  $^{13}\text{C}^{\alpha}\text{-}^1\text{H}^{\alpha}$  correlation maps (17); iv) Gly-optimized  $^{13}\text{C}^{\alpha}$  CEST recorded on a 100%  $\text{D}_2\text{O}$   $[\text{U-}^{15}\text{N}, ^{13}\text{C}]$  A17G FF sample (sample 2) with peak intensities quantified from  $^{13}\text{C}^{\alpha}\text{-}^1\text{H}^{\alpha}$  correlation maps (17).  $^1\text{H}^{\alpha}$   $\overline{\omega}_{I2}$  shifts were obtained from four different CEST experiments all designed to suppress NOE dips arising from interactions with remote protons: i) (HACACO)NH- $^1\text{H}^{\alpha}$  CEST using a  $[\text{U-}^{15}\text{N}, ^{13}\text{C}]$  A17G FF sample (sample 1), quantifying peak intensities from a series of  $^{15}\text{N-}^1\text{H}^{\text{N}}$  correlation maps (26); ii) CT- $^{13}\text{C}^{\alpha}\text{-}^1\text{H}^{\alpha}$   $^1\text{H}^{\alpha}$  CEST (17, 22) using a 100%  $\text{D}_2\text{O}$   $[\text{U-}^{15}\text{N}, ^{13}\text{C}]$  A17G FF sample (sample 2); iii)  $^1\text{H}^{\alpha}$  CEST but using a 100%  $\text{D}_2\text{O}$   $[\text{U-}^{15}\text{N}]$   $^{13}\text{C}^{\alpha}$  A17G FF sample (sample 3) with peak quantification from  $^{13}\text{C}^{\alpha}\text{-}^1\text{H}^{\alpha}$  correlation

maps (17, 22); iv) Gly-optimized  $^1\text{H}^\alpha$  CEST using a 100%  $\text{D}_2\text{O}$  [ $^{\text{U-}}^{15}\text{N}$ ,  $^{13}\text{C}$ ] 50%  $^2\text{H}$  A17G FF sample (sample 4), with peak quantification from a set of  $^{13}\text{C}^\alpha$ - $^1\text{H}^\alpha$  correlation maps (15). The  $^{13}\text{C}^\alpha$  A17G FF sample (sample 3) is crucial to study exchange at  $^1\text{H}^\alpha$  and  $^{13}\text{C}^\alpha$  sites when the  $^{13}\text{C}^\alpha$  and  $^{13}\text{C}^\beta$  carbons are strongly coupled, as is the case for S56, for example.  $^{13}\text{C}^\beta$   $\varpi_{I2}$  shifts were obtained from three different CEST experiments: i) (HBCBCACO)NH- $^{13}\text{C}^\beta$  CEST using a [ $^{\text{U-}}^{15}\text{N}$ ,  $^{13}\text{C}$ ] A17G FF sample (sample 1) and quantifying peak intensities from  $^{15}\text{N}$ - $^1\text{H}^\text{N}$  correlation maps (25); ii) Ser-optimized  $^{13}\text{C}^\beta$  CEST using a 100%  $\text{D}_2\text{O}$  [ $^{\text{U-}}^{15}\text{N}$ ,  $^{13}\text{C}$ ] A17G FF sample (sample 2) and quantifying peak intensities from CT- $^{13}\text{C}^\beta$ - $^1\text{H}^\beta$  correlation maps (17); iii) As in ii) but using a Thr-optimized pulse scheme for Thr residues (17); Methyl  $^{13}\text{C}$  (including Ala  $^{13}\text{C}^\beta$ )  $\varpi_{I2}$  shifts were obtained from methyl  $^{13}\text{C}$  CEST experiments recorded on a [ $^{\text{U-}}^{15}\text{N}$ ,  $^{13}\text{C}$ ] A17G FF sample (sample 1) (17, 27). Methyl  $^1\text{H}$   $\varpi_{I2}$  shifts were obtained using a methyl  $^1\text{H}$  CEST experiment that suppresses dips in CEST profiles arising from dipolar interactions with remote protons (22) (100%  $\text{D}_2\text{O}$  [ $^{\text{U-}}^{15}\text{N}$ ,  $^{13}\text{C}$ ] A17G FF sample; sample 2). In both methyl  $^{13}\text{C}$  and  $^1\text{H}$  CEST experiments peak intensities were quantified from CT- $^{13}\text{C}$ - $^1\text{H}$  correlation maps. Additional details can be found in *SI Appendix*, Tables S1 and S2.

Amide  $^{15}\text{N}$  CEST (methyl  $^{13}\text{C}$  D-CEST (9, 28)) experiments were used to obtain two-state ( $\text{F} \rightleftharpoons \text{I2}$ ) exchange parameters in A17G S56P FF samples dissolved in 10 (100) %  $\text{D}_2\text{O}$  buffer; these samples were used for measurement of NOEs to confirm the I2 state structure. To estimate  $p_{II}$  at 20 °C for the A17G S56P FF sample (sample 13) used to perform the NOESY experiments (Fig. 4), amide  $^{15}\text{N}$  CEST datasets were recorded with four different  $B_1$  ( $T_{EX}$ ) values: 3.2 Hz (400 ms), 53.6 Hz (250 ms), 107.3 Hz (175 ms), and 214.5 Hz (175 ms).

NOEs between G17  $\text{H}^\alpha$  and L55  $\text{H}^\delta$  were recorded using 3D HSQC-NOESY-HSQC or HSQC-NOESY-HMQC experiments, [Gly  $^{13}\text{C}^\alpha$  ( $t_1$ ), methyl  $^{13}\text{C}$  ( $t_2$ ), methyl  $^1\text{H}$  ( $t_3$ )], using A17G FF (sample 5) or A17G S56P FF (sample 13,14) samples that are [ $^{\text{U-}}^{15}\text{N}$ ,  $^{13}\text{C}$ ] enriched at all positions except for the side-chains of Ile, Leu and Val that are [ $^{\text{U-}}^{15}\text{N}$ ], [Ile $\delta$ 1 -  $^{13}\text{CH}_3$ ,  $^2\text{H}$ ; Leu, Val -  $^{13}\text{CH}_3/^{12}\text{CD}_3$ ,  $^2\text{H}$ ]. The mixing time was set to 100 ms in all the experiments.

Chemical shift assignments of A17G S56P FF were obtained starting from previous assignments for A17G FF, and completed by analysis of standard HNCA, HNCO, HNCACO, HNCACB, (H)C(CO)NH-TOCSY, and H(C)(CO)NH-TOCSY datasets (1, 29-31) at 15 °C (11.7 T).

**NMR Data processing and analysis.** NMR data were processed using NMRPipe (32), visualised and assigned using SPARKY (33, 34), with peak intensities quantified using PINT (35). TALOS-N (36) was used to analyse the chemical shifts and obtain residue specific helix propensities, residue specific  $S^2$  values (37), and helix boundaries for the various conformational states of A17G FF. The program *ChemEx* (38) that numerically integrates the Bloch-McConnell equations (39) was used to obtain the best-fit exchange parameters from the CEST data.

Chemical shifts for the I2 folding intermediate were obtained by analysing A17G FF CEST data in a two-state manner with global fitting parameters,  $k_{ex,FI2}$  and  $p_{I2}$ , and residue specific fitting parameters  $R_{2,F}$ ,  $R_{1,F}$ ,  $R_{2,I2}$ ,  $\overline{\omega}_F$  and  $\Delta\overline{\omega}_{FI2}$ . In all analyses  $R_I$  values were assumed to be the same for all conformers (4, 5). In the analysis of some of the CEST data the exchange parameters were fixed to those obtained from amide  $^{15}\text{N}$  or  $^{13}\text{C}^\alpha$  CEST data (See Table S2). To extract the best-fit four-state (F, I1, I2 and U) exchange parameters from analysis of the A17G FF amide  $^{15}\text{N}$  CEST profiles, the four-state model in Figure 1B was used, subject to the constraint  $R_{2,F} = R_{2,I1} = R_{2,I2} = 2R_{2,U}$  (11). In this case, the global fitting parameters were  $k_{ex,FI1}$ ,  $k_{ex,FI2}$ ,  $k_{ex,II12}$ ,  $k_{ex,FU}$ ,  $p_{I1}$ ,  $p_{I2}$  and  $p_U$  ( $k_{ex,I2U} = k_{ex,FU} = 0 \text{ s}^{-1}$  (11)), with residue specific fitting parameters of:  $R_{2,F}$ ,  $R_{1,F}$ ,  $\overline{\omega}_F$ ,  $\Delta\overline{\omega}_{FI1}$ ,  $\Delta\overline{\omega}_{FI2}$  and  $\Delta\overline{\omega}_{FU}$ . To obtain urea  $m$ -values A17G FF  $^{15}\text{N}$  CEST data recorded on samples prepared with five different concentrations of urea were analysed under the assumption that  $\Delta\overline{\omega}_{FI1}$ ,  $\Delta\overline{\omega}_{FI2}$  and  $\Delta\overline{\omega}_{FU}$  are independent of urea concentration with  $\Delta\overline{\omega}_{FI1}$ ,  $\Delta\overline{\omega}_{FI2}$  and  $\Delta\overline{\omega}_{FU}$  values initialised to those obtained previously from the four-state analysis of the A39G FF data (11).

To extract the best-fit three-state (F, I1, and I2) exchange parameters from the A17G S56P FF amide  $^{15}\text{N}$  CEST data, the three-state triangular model in which all three states interconvert with each other was fit to CEST data subject to the constraint  $R_{2,F} = R_{2,I1} = R_{2,I2}$ . Global (residue specific) fitting parameters were  $k_{ex,FI1}$ ,  $k_{ex,FI2}$ ,  $k_{ex,II12}$ ,  $p_{I1}$  and  $p_{I2}$  ( $R_{2,F}$ ,  $R_{1,F}$ ,  $\overline{\omega}_F$ ,  $\Delta\overline{\omega}_{FI1}$  and  $\Delta\overline{\omega}_{FI2}$ ), and  $\Delta\overline{\omega}_{FI1}$  and  $\Delta\overline{\omega}_{FI2}$  were initialised to the values previously determined from the four-state analysis of the A39G FF  $^{15}\text{N}$  CEST data (11). Two-state analysis of the A17G S56P FF CEST data followed as for A17G FF, with  $k_{ex,FI2}$  and  $p_{I2}$  ( $R_{2,F}$ ,  $R_{1,F}$ ,  $R_{2,I2}$ ,  $\overline{\omega}_F$  and  $\Delta\overline{\omega}_{FI2}$ ) global (residue specific) fitting parameters. Bootstrap or Monte Carlo procedures (100 trials) were used to estimate the uncertainties in all the fitted exchange parameters (40).

**Structure calculations.** The CS-ROSETTA (41) protocol was used to calculate the structural ensemble of the A17G FF I2 state solely from chemical shifts (41-43). 10,000 structures were calculated and the (rescaled) energy versus  $\text{C}^\alpha$  RMSD to the lowest energy structure clearly shows that calculation has converged, with an RMSD of  $0.8 \pm 0.2 \text{ \AA}$  for the lowest energy structure to the 10 lowest energy structures (Fig. S3). As a control the same structure calculation procedure was repeated using F state shifts for the same sites that the I2 state shifts are available. This calculation also converged; the 10 lowest energy structures have a  $\text{C}^\alpha$  RMSD of  $0.9 \pm 0.2 \text{ \AA}$  to lowest energy structure and a  $\text{C}^\alpha$  RMSD of  $1.4 \pm 0.2 \text{ \AA}$  to the lowest energy F state structure of WT FF obtained by conventional NMR based methods (44) (Fig. S3). Residues W11 to Q68 ( $S^2 \geq 0.65$ ) were used for the RMSD calculations. Some of the CS-ROSETTA calculations were performed on NMRbox (45). Structures were visualised and analysed using UCSF Chimera (46).

**Extracting urea  $m$ -values.** Starting from the reaction  $F \rightleftharpoons K$ , where  $F$  and  $K$  are a pair of exchanging states (potentially of a more complex exchange pathway) it follows directly that  $\Delta G_{FK} = G_K - G_F = -RT \ln\left(\frac{p_K}{p_F}\right)$ , where  $R$  and  $T$  are the gas constant and the absolute temperature, respectively. Writing

$\Delta G_{FK}(urea) = \Delta G_{FK}(OM\ urea) - m_{FK}[urea]$ , it becomes clear that  $\frac{d\Delta G_{FK}}{d[urea]} = -m_{FK}$  and, therefore, the slope of the  $\Delta G_{FK} = -RT\ln\left(\frac{p_K}{p_F}\right)$  vs  $[urea]$  plot is  $-m_{FK}$ . Further, it is straightforward to show that for the reaction  $F \rightleftharpoons L \rightleftharpoons \dots \rightleftharpoons K$   $\Delta G_{FK} = -RT\ln\left(\frac{p_K}{p_F}\right)$  as well, so that the slope of the  $\Delta G_{FK}$  vs  $[urea]$  plot is also  $-m_{FK}$ . In a similar manner the urea  $m$ -value of the transition state connecting states  $K$  and  $L$  ( $TS_{KL}$ ), for example, can be obtained by defining  $\Delta G_{FTSKL} = G_{TSKL} - G_F$ , where  $G_{TSKL}$  is the free energy of the transition state. Writing  $\Delta G_{FTSKL} = (G_{TSKL} - G_K) - (G_F - G_K)$  and noting that  $k_{kl} = C\exp\left(-\frac{G_{TSKL}-G_K}{RT}\right)$ , where  $k_{KL}$  is the forward rate constant for the reaction  $K \rightleftharpoons L$ , and  $C$  is a constant, it follows that  $\Delta G_{FTSKL} = -RT\ln\left(\frac{k_{KL}}{C}\right) - RT\ln\left(\frac{p_K}{p_F}\right)$ . Noting that  $\Delta G_{FTSKL}(urea) = \Delta G_{FTSKL}(OM\ urea) - m_{TSKL}[urea]$ , it follows that the slope of the  $\Delta G_{FTSKL} = -RT\ln\left(\frac{k_{KL}}{C}\right) - RT\ln\left(\frac{p_K}{p_F}\right)$  vs  $[urea]$  plot is  $-m_{TSKL}$ . While  $C$  was set to be  $10^7\ s^{-1}$  in this study, the value of  $C$  does not affect the extracted transition state  $m$  value.

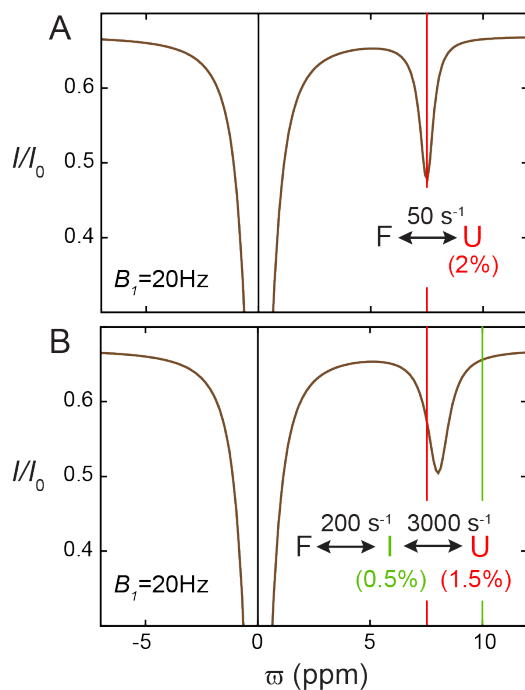

**Fig. S1.** Large changes in amide  $^{15}\text{N}$  CEST profiles due to exchange between sparsely populated states on the intermediate exchange time-scale. (A)  $^{15}\text{N}$  CEST profile calculated for the two-state  $F \rightleftharpoons U$  exchange process shown in the figure. There is a clear dip at  $\omega_U$  (7.5 ppm; red line) even though  $p_U$  is only 2%. (B)  $^{15}\text{N}$  CEST profile calculated for the three-state  $F \rightleftharpoons I \rightleftharpoons U$  exchange process in which the F to U interconversion proceeds via a sparsely populated intermediate I. The U state dip has broadened and shifted towards  $\omega_I$  (10 ppm; green line); broadening of minor state dips is thus an indicator of minor exchange. Such CEST profiles can be analysed in a two-state ( $F \rightleftharpoons U$ ) manner with the resulting best-fit parameters reporting on exchange between state F and a second state that is a composite of U and I. The best fit  $R_2$  values of state U will be elevated (beyond what would be expected based on the size of the biomolecule), and consequently elevated minor state  $R_2$  values are a sign of minor exchange (4, 11, 24). The calculations were performed with  $\omega_F = 0$  ppm (black line),  $B_0 = 16.4$  T,  $B_1 = 20$  Hz,  $R_{1,F} = R_{1,U} = R_{1,I} = 1 \text{ s}^{-1}$ ,  $R_{2,F} = R_{2,U} = R_{2,I} = 10 \text{ s}^{-1}$  and  $T_{EX} = 400$  ms.

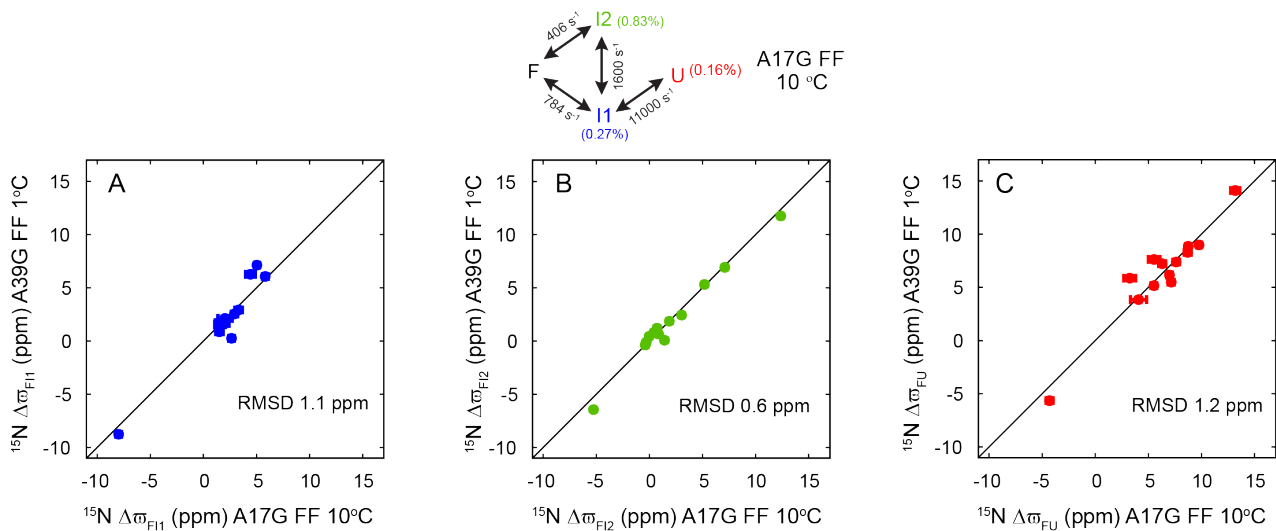

**Fig. S2.** Comparison of  $\Delta\varpi_{FI1}$ ,  $\Delta\varpi_{FI2}$ , and  $\Delta\varpi_{FU}$  values obtained from the four-state analysis of A17G FF amide  $^{15}\text{N}$  CEST data recorded at 10 °C with the corresponding values for A39G FF obtained previously (1 °C) (11). For A17G FF the best-fit exchange parameters for the model shown on top are:  $k_{ex,FI1} = 784 \pm 67 \text{ s}^{-1}$ ,  $k_{ex,FI2} = 406 \pm 5 \text{ s}^{-1}$ ,  $k_{ex,I1I2} = 1600 \pm 113 \text{ s}^{-1}$ ,  $k_{ex,I1U} = 11000 \pm 1064 \text{ s}^{-1}$ ,  $p_{I1} = 0.27 \pm 0.01\%$ ,  $p_{I2} = 0.83 \pm 0.01\%$  and  $p_U = 0.16 \pm 0.02\%$ . The excellent correlation between the  $\Delta\varpi$  values from A39G and A17G FF establishes that both variants sample the same I1, I2 and U states. Additional details can be found in Table S4.



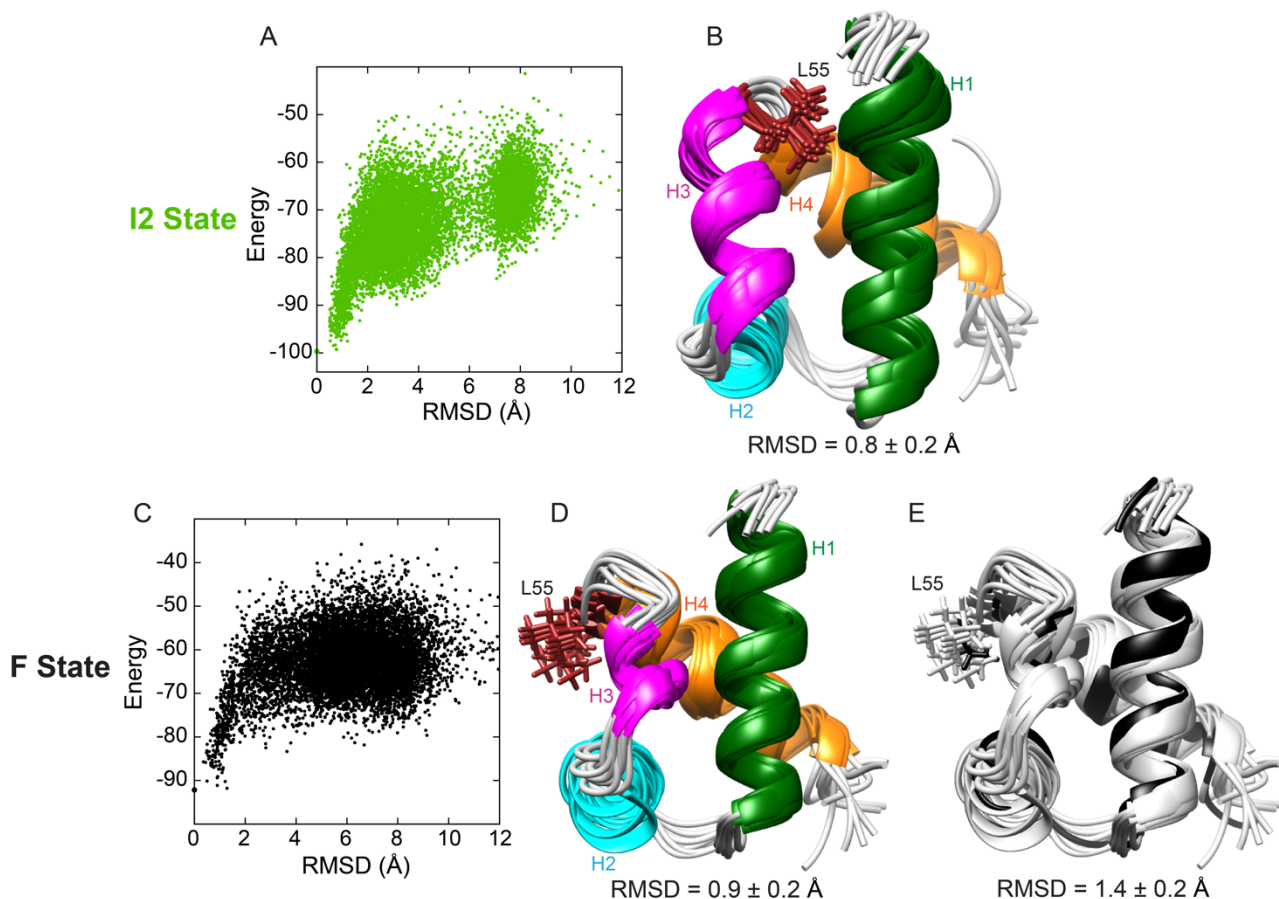

**Fig. S3.** Convergence of CS-ROSETTA structure calculations using CEST derived A17G FF I2 state chemical shifts. (A) Convergence plot of the CS-ROSETTA I2 state structure calculations. The rescaled CS-ROSETTA all-atom energy for each of the calculated structures is plotted against the C $\alpha$  RMSD to the lowest energy structure. (B) The ten lowest energy models are tightly clustered (C $\alpha$  RMSD < 2 Å) with a C $\alpha$  RMSD to the lowest energy structure of  $0.8 \pm 0.2$  Å, establishing convergence of the structure calculations. Note that the position of the sidechain of L55 is well defined. (C-E) Control calculations performed using the F state chemical shifts. The chemical shifts for a given atomic site was used in the F state CS-ROSETTA calculations only if the I2 state chemical shift for the same site was available. (C) Convergence plot of the CS-ROSETTA F state structure calculations. (D) The ten lowest energy models are tightly clustered with a C $\alpha$  RMSD to the lowest energy structure is  $0.9 \pm 0.2$  Å, showing that the F state structure calculations have also converged. The position of the sidechain of L55 is well defined and different from its position in (B). (E) Superposition of the ten lowest energy CS-ROSETTA A17G FF F state structures (grey) on the F state structure of WT FF (black; PDB: 1UZC) obtained using conventional NMR experiments (44); C $\alpha$  RMSD:  $1.4 \pm 0.2$  Å. The sidechain of L55 is in the same position in both the CS-ROSETTA derived A17G FF F state structural ensemble and the NOE-based WT FF structure. Only residues 11 to 68 that have RCI S $^2 \geq 0.65$  were used for the C $\alpha$  RMSD calculations.

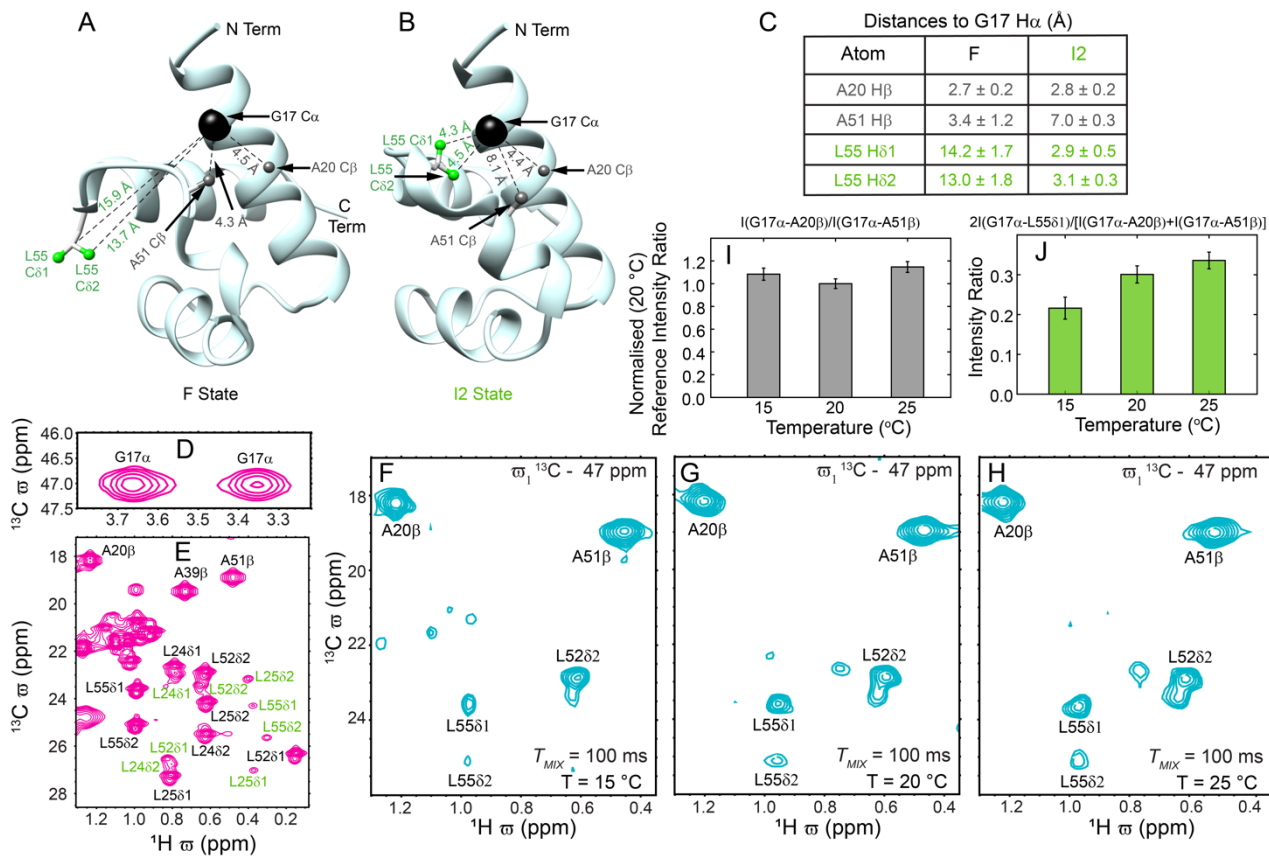

**Fig. S4.** Validating the CEST derived I2 state structure. (A,B,C) Distances between G17 C $\alpha$  and A20 C $\beta$ , A51 C $\beta$ , and L55  $\delta$ 1/  $\delta$ 2 methyl group(s) in the F (A) and I2 (B) states. Note that the distances between G17 C $\alpha$  and the L55 methyl  $\delta$  groups that are large in F ( $\sim$ 15 Å) become considerably smaller in I2 ( $\sim$ 4.5 Å). The distances between G17 C $\alpha$  and A20/A51 C $\beta$  are short in F ( $\sim$ 4.5 Å) (A); these are used as references. The distance between G17 C $\alpha$  and A51 C $\beta$  increases in I2 ( $\sim$ 8.1 Å) (B). Distances are summarised in (C) where the mean and the standard deviation based on the ten calculated lowest energy structures is reported while in (A) and (B) distances from the lowest energy structure are shown. The Gly H $\alpha$ -C $\alpha$  (D) and methyl (E) regions of the  $^1\text{H}$ - $^{13}\text{C}$  correlation map of A17G S56P FF (20 °C). In (E) correlations arising from the I2 state are indicated in green. (F-H) Methyl region ( $\omega_2, \omega_3$ ) extracted from a 3D HSQC( $\omega_1$ )-NOESY-HSQC ( $\omega_2, \omega_3$ ) spectrum at  $\omega_1 = 47$  ppm, corresponding to the G17  $^{13}\text{C}\alpha$  chemical shift. 3D NOESY datasets were recorded at 15 (F;  $k_{ex,FI2} \sim 18.8 \pm 0.9 \text{ s}^{-1}; p_{I2} \sim 20.4 \pm 0.5 \%$ ), 20 (G;  $k_{ex,FI2} \sim 35.1 \pm 0.9 \text{ s}^{-1}; p_{I2} \sim 25.1 \pm 0.4 \%$ ) and 25 (H;  $k_{ex,FI2} \sim 62.8 \pm 2 \text{ s}^{-1}; p_{I2} \sim 27.6 \pm 0.4 \%$ ) °C. Correlations are only seen in the NOESY spectra for methyl protons proximal to the G17 H $\alpha$  sites. (I) The intensity ratios of the G17H $\alpha$ -A20H $\beta$  and G17H $\alpha$ -A51H $\beta$  ‘reference’ NOEs do not change with temperature as these NOEs largely arise from the F state (short distances in F, long distance for G17H $\alpha$ -A51H $\beta$  in I2, (A,B,C)). The intensity ratios at each of these three temperatures are scaled by the intensity ratio at 20 °C. (J) The intensity ratios of G17H $\alpha$ -L55H $\delta$ 1 and the average of the G17H $\alpha$ -A20H $\beta$ -and G17H $\alpha$ -A51H $\beta$  correlations increase with temperature even as the rotational correlation time decreases, consistent with the G17-L55 NOEs arising from magnetization transfer in the I2 state as  $p_{I2}$  increases with temperature. The A17G S56P FF sample used in all these experiments is [ $^{15}\text{N}$ ,  $^{13}\text{C}$ ] enriched everywhere except for the side-chains of Ile, Leu and Val that are [Ile $\delta$ 1 -  $^{13}\text{CH}_3$ ,  $^2\text{H}$ ; Leu, Val -  $^{13}\text{CH}_3/^{12}\text{CD}_3$ ,  $^2\text{H}$ ] (sample 13). Hence methyl residues from sites other than Ile $\delta$ 1, Leu $\delta$ 1, $\delta$ 2, Val  $\gamma$ 1, $\gamma$ 2 are split in the methyl  $^{13}\text{C}$  dimension of the  $^1\text{H}$ - $^{13}\text{C}$  HSQC correlation map that was recorded without a constant time period (E). Residual protonation at the carbon adjacent to the methyl group leads to a small shoulder in the  $^{13}\text{C}$  dimension of the Ile $\delta$ 1, Leu $\delta$ 1, $\delta$ 2, Val  $\gamma$ 1, $\gamma$ 2 correlations.

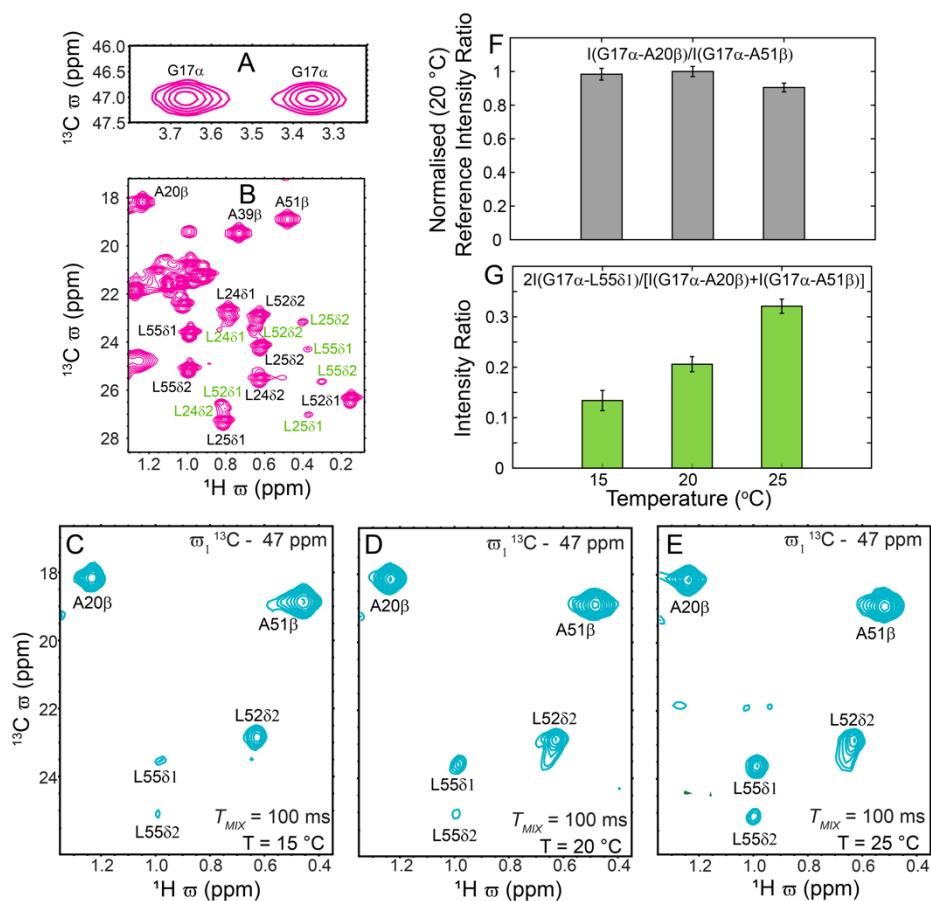

**Fig S5.** (A-G) are similar to Fig S4 (D-J), except that the protein (sample 14) was dissolved in 100% D<sub>2</sub>O, 30% glucose buffer rather than 10% D<sub>2</sub>O, 30% glucose buffer and a 3D HSQC-NOESY-HMOC rather than a 3D HSQC-NOESY-HSQC experiment was used to detect NOE correlations between G17 H<sup>α</sup> and L55 H<sup>δ</sup>. Two-state exchange parameters ( $k_{ex,FI2}$ ,  $p_{I2}$ ) obtained from methyl <sup>13</sup>C D-CEST experiments (17, 27) at 15, 20 and 25 °C are ( $20 \pm 0.7$  s<sup>-1</sup>; 12.5 ± 0.2 %), ( $44.9 \pm 1.5$  s<sup>-1</sup>; 16.4 ± 0.3 %) and ( $66 \pm 3$  s<sup>-1</sup>; 20.9 ± 0.2 %) respectively.

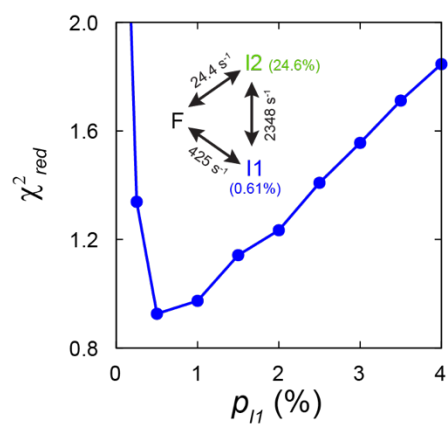

**Fig. S6.**  $\chi_{red}^2$  vs  $p_{I1}$  obtained from a three-state analysis of A17G S56P FF amide  $^{15}\text{N}$  CEST data recorded at 20 °C ( $B_1 = 3.2, 53.6, 107.3$  and  $214.5$  Hz;  $16.4$  T; sample 13). A triangular three-state model was fit ( $\chi_{red}^2 \sim 0.92$ ,  $k_{ex,F11} = 425 \pm 105 \text{ s}^{-1}$ ,  $k_{ex,F12} = 24.4 \pm 4.1 \text{ s}^{-1}$ ,  $k_{ex,I1I2} = 2348 \pm 210 \text{ s}^{-1}$ ,  $p_{I1} = 0.61 \pm 0.05 \%$  and  $p_{I2} = 24.6 \pm 1 \%$ ) to amide  $^{15}\text{N}$  CEST data from I43, S50, L52, A53, K59 & V67.  $^{15}\text{N}$  CEST experiments were carried out using the same sample (sample 13) that was used to record the NOESY experiments shown in Fig. 4F,G and *SI Appendix*, Fig. S4. In the calculations of the  $\chi_{red}^2$  vs  $p_{I1}$  profile  $\Delta\omega_{F11}$  values were held to within  $\pm 2$  ppm of those determined previously from the four-state analysis of A39G FF (11).

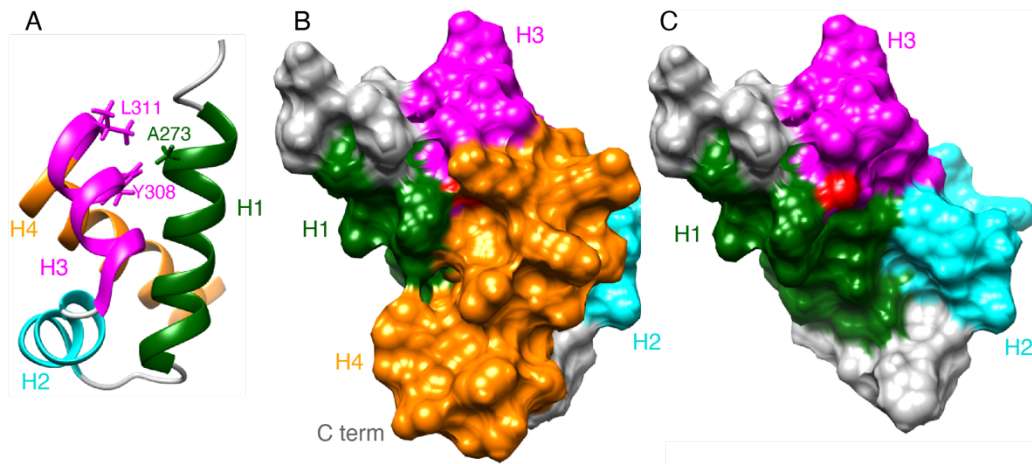

**Fig. S7.** (A) Ribbon representation of the native state of RhoGAPFF1 (PDB: 2k85) (47) illustrating the elongated H3 helix and that L311 from H3 is close to A273 from H1 in this construct akin to the proximity of L55 and A17 in the WT FF structure. Surface representation of RhoGAPFF1 in its native (B) and ‘RhoGAPFF1 I1’ states (C). In the native conformation the oxygen from the OH group of Y308 (coloured red) is inaccessible for phosphorylation (B). However when H4 is deleted, ‘RhoGAPFF1 I1’ state, (the structural equivalent of I1 where H4 is disordered), the oxygen from the OH group of Y308 (red) is clearly visible and accessible for modification (C). The molecular orientation in (A) differs from that in (B) and (C). In the HYPA/FBP11 FF domain, the equivalents of RhoGAPFF1 A273, Y308, and L311 are A17, L52, and L55, respectively.



| Sample No       | Sample Details                                                                                                                                | CEST Experiment     | $B_1$ (Hz)             | $T_{EX}$ (ms) | $k_{ex}$ ( $s^{-1}$ )                               | $p_{12}$ (%)                                                               | Comments                                                                                   |
|-----------------|-----------------------------------------------------------------------------------------------------------------------------------------------|---------------------|------------------------|---------------|-----------------------------------------------------|----------------------------------------------------------------------------|--------------------------------------------------------------------------------------------|
| 1               | [U- $^{15}N$ , $^{13}C$ ] A17G FF<br>50mM Sodium acetate, 100mM NaCl, 2mM EDTA, 2mM $NaN_3$ , 20% [ $^2H$ ]-glucose, 7% $D_2O$ , pH 5.7       | $^{15}N$            | 31.7                   | 350           | $630 \pm 6$                                         | $2.08 \pm 0.01$                                                            | $^1H$ - $^{15}N$ plane                                                                     |
|                 |                                                                                                                                               |                     | 52.9                   | 350           |                                                     |                                                                            |                                                                                            |
|                 |                                                                                                                                               | $^{13}C^\alpha$     | 40.9                   | 350           | Exchange parameters were fixed to the above values. | $^1H$ - $^{15}N$ plane                                                     |                                                                                            |
|                 |                                                                                                                                               | $^{13}C^O$          | 46                     | 350           |                                                     | $^1H$ - $^{15}N$ plane                                                     |                                                                                            |
|                 |                                                                                                                                               | $^{13}C^O$          | 46                     | 350           |                                                     | $^1H$ - $^{13}C^O$ plane                                                   |                                                                                            |
|                 |                                                                                                                                               | $^{13}C^\beta$      | 46                     | 300           |                                                     | $^1H$ - $^{15}N$ plane                                                     |                                                                                            |
|                 |                                                                                                                                               | $^1H^N$             | 35.8                   | 350           |                                                     | $^1H$ - $^{15}N$ plane                                                     |                                                                                            |
|                 |                                                                                                                                               | $^1H^\alpha$        | 46                     | 350           |                                                     | $^1H$ - $^{15}N$ plane                                                     |                                                                                            |
| Methyl $^{13}C$ | 45.3                                                                                                                                          | 350                 | $^1H$ - $^{13}C$ plane |               |                                                     |                                                                            |                                                                                            |
| 2               | [U- $^{15}N$ , $^{13}C$ ] A17G FF<br>50mM Sodium acetate, 100mM NaCl, 2mM EDTA, 2mM $NaN_3$ , 20% [ $^2H$ ]-glucose, 100% $D_2O$ , pH 5.7     | $^{13}C^\alpha$     | 35.7                   | 350           | $474 \pm 21$                                        | $1.71 \pm 0.02$                                                            | Used to obtain missing I2 state $C^\alpha$ shifts ( $^1H^\alpha$ - $^{13}C^\alpha$ plane). |
|                 |                                                                                                                                               |                     | 46                     | 350           |                                                     |                                                                            |                                                                                            |
|                 |                                                                                                                                               | Gly $^{13}C^\alpha$ | 42.4                   | 400           | Exchange parameters were fixed to the above values. | $^1H^\alpha$ - $^{13}C^\alpha$ plane                                       |                                                                                            |
|                 |                                                                                                                                               | Ser $^{13}C^\beta$  | 40.8                   | 350           |                                                     | $^1H^\beta$ - $^{13}C^\beta$ plane                                         |                                                                                            |
|                 |                                                                                                                                               | Thr $^{13}C^\beta$  | 46                     | 350           |                                                     | $^1H^\beta$ - $^{13}C^\beta$ plane                                         |                                                                                            |
|                 |                                                                                                                                               | $^1H^\alpha$        | 46                     | 350           |                                                     | $^1H^\alpha$ - $^{13}C^\alpha$ plane                                       |                                                                                            |
| Methyl $^1H$    | 46                                                                                                                                            | 400                 | $^1H$ - $^{13}C$ plane |               |                                                     |                                                                            |                                                                                            |
| 3               | [U- $^{15}N$ ], $^{13}C^\alpha$<br>50mM Sodium acetate, 100mM NaCl, 2mM EDTA, 2mM $NaN_3$ , 20% [ $^2H$ ]-glucose, 100% $D_2O$ , pH 5.7       | $^{13}C^\alpha$     | 38.3                   | 350           | $501 \pm 28$                                        | $1.67 \pm 0.02$                                                            | Obtain the S56 $^{13}C^\alpha$ shift ( $^1H^\alpha$ - $^{13}C^\alpha$ plane).              |
|                 |                                                                                                                                               |                     | 49.3                   | 350           |                                                     |                                                                            |                                                                                            |
|                 |                                                                                                                                               | $^1H^\alpha$        | 35.5                   | 350           | Exchange parameters were fixed to the above values. | Obtain the S56 $^1H^\alpha$ shift ( $^1H^\alpha$ - $^{13}C^\alpha$ plane). |                                                                                            |
|                 |                                                                                                                                               |                     | 45.6                   | 350           |                                                     |                                                                            |                                                                                            |
| 4               | [U- $^{15}N$ , $^{13}C$ ], ~50% $^2H$<br>50mM Sodium acetate, 100mM NaCl, 2mM EDTA, 2mM $NaN_3$ , 20% [ $^2H$ ]-glucose, 100% $D_2O$ , pH 5.7 | Gly $^1H^\alpha$    | 24.7                   | 350           | $456 \pm 70$                                        | $1.85 \pm 0.1$                                                             | Gly $^1H^\alpha$ CEST experiment ( $^1H^\alpha$ - $^{13}C^\alpha$ plane).                  |
|                 |                                                                                                                                               |                     | 39.6                   | 350           |                                                     |                                                                            |                                                                                            |

**Table S2.** Summary of the (16.4 T) CEST NMR experiments carried out at 20 °C using various A17G FF samples to obtain the chemical shifts of the I2 state. Sample numbers are from Table S1.

**Table S3.**  $\omega_F$  and the CEST derived  $\Delta\omega_{F12}$  values of A17G FF. The I2 state chemical shifts ( $\omega_{I2}$ ) can be calculated from the F state chemical shifts ( $\omega_F$ ) and  $\Delta\omega_{F12}$  values as  $\omega_{I2} = \omega_F + \Delta\omega_{F12}$ . Experiments were performed at 20 °C using the samples and experiments listed in tables S1 and S2 respectively.

| Residue | Nucleus | $\omega_F$ (ppm) | $\Delta\omega_{F12}$ (ppm) |
|---------|---------|------------------|----------------------------|
| W11     | C       | 175.27           | 0.6 ± 0.1                  |
| W11     | Ca      | 56.98            | -0.7 ± 0.1                 |
| W11     | Cβ      | 29.29            | 0.0 ± 0.1                  |
| W11     | Ha      | 4.802            | 0.00 ± 0.02                |
| N12     | C       | 175.35           | 0.3 ± 0.2                  |
| N12     | Ca      | 54.65            | -0.5 ± 0.1                 |
| N12     | Cβ      | 40.27            | 0.0 ± 0.1                  |
| N12     | HN      | 9.065            | -0.15 ± 0.08               |
| N12     | Ha      | 4.762            | 0.13 ± 0.03                |
| N12     | N       | 120.05           | -1.7 ± 0.1                 |
| T13     | C       | 175.36           | 0.0 ± 0.1                  |
| T13     | Ca      | 59.80            | -0.4 ± 0.3                 |
| T13     | Cβ      | 72.26            | 0.6 ± 0.2                  |
| T13     | Cγ2     | 21.87            | 0.0 ± 0.1                  |
| T13     | HN      | 7.774            | 0.08 ± 0.07                |
| T13     | Ha      | 4.733            | -0.15 ± 0.03               |
| T13     | Hy2     | 1.322            | 0.00 ± 0.01                |
| T13     | N       | 108.87           | 1.5 ± 0.2                  |
| K14     | C       | 178.81           | -0.3 ± 0.2                 |
| K14     | Ca      | 58.74            | 0.8 ± 0.1                  |
| K14     | Cβ      | 31.58            | 0.0 ± 0.2                  |
| K14     | HN      | 8.957            | -0.18 ± 0.09               |
| K14     | Ha      | 4.240            | 0.14 ± 0.03                |
| K14     | N       | 123.13           | -0.8 ± 0.1                 |
| E15     | C       | 179.22           | 0.4 ± 0.3                  |
| E15     | Ca      | 59.61            | 0.0 ± 0.2                  |
| E15     | Cβ      | 28.99            | 0.0 ± 0.1                  |
| E15     | HN      | 8.533            | -0.15 ± 0.06               |
| E15     | Ha      | 4.019            | 0.19 ± 0.01                |
| E15     | N       | 119.23           | 0.2 ± 0.1                  |
| E16     | C       | 179.99           | 0.3 ± 0.2                  |
| E16     | Ca      | 59.08            | 0.0 ± 0.1                  |
| E16     | Cβ      | 30.54            | 0.0 ± 0.1                  |
| E16     | HN      | 8.001            | -0.15 ± 0.05               |
| E16     | Ha      | 4.163            | -0.20 ± 0.02               |
| E16     | N       | 119.82           | -0.7 ± 0.1                 |
| G17     | C       | 174.77           | 0.0 ± 0.1                  |
| G17     | Ca      | 47.09            | -0.2 ± 0.2                 |
| G17     | HN      | 8.369            | -0.13 ± 0.02               |
| G17     | Ha2     | 3.349            | -0.46 ± 0.01               |
| G17     | Ha1     | 3.660            | -0.90 ± 0.01               |
| G17     | N       | 109.75           | -0.3 ± 0.1                 |
| K18     | C       | 178.87           | 0.6 ± 0.3                  |
| K18     | Ca      | 60.29            | 0.0 ± 0.1                  |
| K18     | Cβ      | 32.50            | 0.0 ± 0.1                  |
| K18     | HN      | 8.346            | -0.13 ± 0.01               |
| K18     | Ha      | 3.761            | 0.22 ± 0.01                |
| K18     | N       | 121.31           | 0.0 ± 0.1                  |
| Q19     | C       | 178.06           | 0.0 ± 0.1                  |
| Q19     | Ca      | 58.67            | 0.1 ± 0.1                  |
| Q19     | Cβ      | 27.89            | 0.0 ± 0.1                  |
| Q19     | HN      | 7.842            | -0.15 ± 0.01               |
| Q19     | Ha      | 4.043            | 0.23 ± 0.01                |



|     |     |        |              |
|-----|-----|--------|--------------|
| Q19 | N   | 118.41 | 0.2 ± 0.1    |
| A20 | C   | 178.95 | 0.8 ± 0.2    |
| A20 | Ca  | 54.89  | 0.0 ± 0.1    |
| A20 | Cβ  | 18.18  | 0.0 ± 0.1    |
| A20 | HN  | 7.947  | -0.19 ± 0.12 |
| A20 | Ha  | 4.124  | -0.16 ± 0.05 |
| A20 | Hβ  | 1.286  | 0.08 ± 0.02  |
| A20 | N   | 122.53 | -0.3 ± 0.1   |
| F21 | C   | 177.08 | 0.4 ± 0.1    |
| F21 | Ca  | 61.79  | 0.7 ± 0.2    |
| F21 | Cβ  | 40.36  | 0.0 ± 0.2    |
| F21 | HN  | 8.106  | 0.35 ± 0.07  |
| F21 | Ha  | 3.746  | 0.00 ± 0.02  |
| F21 | N   | 119.06 | 0.5 ± 0.1    |
| K22 | C   | 178.90 | 0.0 ± 0.1    |
| K22 | Ca  | 60.45  | 0.0 ± 0.2    |
| K22 | Cβ  | 32.00  | 0.0 ± 0.1    |
| K22 | HN  | 8.019  | -0.16 ± 0.01 |
| K22 | Ha  | 3.886  | 0.20 ± 0.01  |
| K22 | N   | 117.43 | 0.4 ± 0.1    |
| E23 | C   | 178.52 | 0.2 ± 0.2    |
| E23 | Ca  | 59.35  | 0.0 ± 0.1    |
| E23 | Cβ  | 29.15  | 0.0 ± 0.1    |
| E23 | HN  | 8.284  | -0.18 ± 0.09 |
| E23 | Ha  | 3.916  | 0.00 ± 0.03  |
| E23 | N   | 120.20 | -0.9 ± 0.1   |
| L24 | C   | 176.64 | 1.2 ± 0.1    |
| L24 | Ca  | 58.24  | 0.5 ± 0.1    |
| L24 | Cβ  | 40.95  | 0.0 ± 0.1    |
| L24 | Cδ1 | 22.93  | -0.4 ± 0.2   |
| L24 | Cδ2 | 25.85  | -0.2 ± 0.3   |
| L24 | HN  | 7.746  | -0.16 ± 0.05 |
| L24 | Ha  | 3.753  | 0.00 ± 0.02  |
| L24 | Hδ1 | 0.882  | 0.12 ± 0.02  |
| L24 | Hδ2 | 0.713  | 0.11 ± 0.03  |
| L24 | N   | 122.78 | -0.3 ± 0.1   |
| L25 | C   | 177.64 | 0.4 ± 0.1    |
| L25 | Ca  | 57.97  | 0.0 ± 0.1    |
| L25 | Cβ  | 40.80  | 0.0 ± 0.1    |
| L25 | Cδ1 | 27.25  | 0.0 ± 0.2    |
| L25 | Cδ2 | 24.24  | -0.9 ± 0.1   |
| L25 | HN  | 7.211  | -0.15 ± 0.08 |
| L25 | Ha  | 3.350  | 0.15 ± 0.02  |
| L25 | Hδ1 | 0.868  | -0.41 ± 0.02 |
| L25 | Hδ2 | 0.675  | 0.00 ± 0.04  |
| L25 | N   | 117.59 | 0.2 ± 0.1    |
| K26 | C   | 181.22 | 0.0 ± 0.2    |
| K26 | Ca  | 58.97  | -0.3 ± 0.2   |
| K26 | Cβ  | 33.05  | 0.0 ± 0.1    |
| K26 | HN  | 7.543  | -0.04 ± 0.05 |
| K26 | Ha  | 4.239  | 0.21 ± 0.01  |
| K26 | N   | 115.56 | 2.2 ± 0.1    |
| E27 | C   | 179.10 | 0.0 ± 0.2    |
| E27 | Ca  | 59.47  | 0.0 ± 0.1    |
| E27 | Cβ  | 30.35  | 0.3 ± 0.2    |
| E27 | HN  | 9.017  | -0.34 ± 0.01 |
| E27 | Ha  | 3.978  | 0.33 ± 0.01  |
| E27 | N   | 122.66 | -0.1 ± 0.1   |
| K28 | C   | 174.54 | 0.0 ± 0.1    |
| K28 | Ca  | 54.12  | 0.0 ± 0.2    |
| K28 | Cβ  | 30.70  | 0.0 ± 0.1    |

|     |     |        |              |
|-----|-----|--------|--------------|
| K28 | HN  | 7.760  | -0.15 ± 0.08 |
| K28 | Ha  | 4.220  | 0.21 ± 0.01  |
| K28 | N   | 114.05 | 1.2 ± 0.1    |
| R29 | C   | 176.50 | 0.4 ± 0.1    |
| R29 | Ca  | 55.87  | -0.2 ± 0.1   |
| R29 | Cβ  | 26.66  | 0.0 ± 0.1    |
| R29 | HN  | 7.914  | -0.17 ± 0.04 |
| R29 | Ha  | 3.867  | 0.22 ± 0.05  |
| R29 | N   | 115.37 | -0.1 ± 0.1   |
| V30 | Ca  | 61.68  | -0.3 ± 0.2   |
| V30 | Cγ1 | 21.19  | -0.5 ± 0.1   |
| V30 | Cγ2 | 22.48  | 0.0 ± 0.1    |
| V30 | HN  | 7.567  | -0.10 ± 0.06 |
| V30 | Ha  | 3.897  | -0.43 ± 0.05 |
| V30 | Hγ1 | 1.220  | -0.09 ± 0.02 |
| V30 | Hγ2 | 1.107  | 0.12 ± 0.02  |
| V30 | N   | 120.30 | -0.4 ± 0.1   |
| P31 | C   | 177.53 | 0.0 ± 0.1    |
| P31 | Ca  | 63.38  | -0.3 ± 0.1   |
| P31 | Cβ  | 32.86  | -0.4 ± 0.2   |
| P31 | Ha  | 4.635  | 0.22 ± 0.01  |
| S32 | C   | 173.89 | 0.0 ± 0.1    |
| S32 | Ca  | 60.86  | 0.4 ± 0.3    |
| S32 | Cβ  | 62.68  | 0.8 ± 0.3    |
| S32 | HN  | 8.777  | -0.16 ± 0.04 |
| S32 | Ha  | 3.998  | 0.24 ± 0.01  |
| S32 | N   | 115.90 | 0.2 ± 0.1    |
| N33 | C   | 175.81 | 0.0 ± 0.1    |
| N33 | Ca  | 51.61  | -0.3 ± 0.1   |
| N33 | Cβ  | 37.78  | 0.0 ± 0.1    |
| N33 | HN  | 7.832  | -0.18 ± 0.09 |
| N33 | Ha  | 4.819  | 0.17 ± 0.02  |
| N33 | N   | 115.24 | -0.2 ± 0.1   |
| A34 | C   | 177.66 | 0.0 ± 0.1    |
| A34 | Ca  | 52.42  | 0.5 ± 0.2    |
| A34 | Cβ  | 19.59  | 0.0 ± 0.1    |
| A34 | HN  | 7.534  | -0.15 ± 0.01 |
| A34 | Ha  | 4.464  | 0.25 ± 0.02  |
| A34 | Hβ  | 1.610  | -0.02 ± 0.01 |
| A34 | N   | 122.75 | -0.2 ± 0.2   |
| S35 | C   | 175.47 | 0.4 ± 0.1    |
| S35 | Ca  | 56.69  | 0.0 ± 0.1    |
| S35 | Cβ  | 65.45  | 0.0 ± 0.4    |
| S35 | HN  | 8.322  | -0.16 ± 0.07 |
| S35 | Ha  | 4.884  | 0.00 ± 0.08  |
| S35 | N   | 115.79 | 0.0 ± 0.1    |
| W36 | C   | 175.92 | 0.6 ± 0.1    |
| W36 | Ca  | 59.63  | 0.0 ± 0.1    |
| W36 | HN  | 9.379  | -0.17 ± 0.03 |
| W36 | Ha  | 3.980  | 0.15 ± 0.01  |
| W36 | N   | 122.56 | 0.8 ± 0.1    |
| E37 | C   | 178.96 | 0.4 ± 0.1    |
| E37 | Ca  | 60.89  | -0.7 ± 0.1   |
| E37 | Cβ  | 28.63  | 0.0 ± 0.1    |
| E37 | HN  | 8.621  | -0.22 ± 0.08 |
| E37 | Ha  | 3.329  | 0.22 ± 0.01  |
| E37 | N   | 115.97 | -0.2 ± 0.1   |
| Q38 | C   | 178.32 | 0.0 ± 0.1    |
| Q38 | Ca  | 58.17  | 0.0 ± 0.1    |
| Q38 | Cβ  | 28.67  | 0.0 ± 0.1    |
| Q38 | HN  | 7.440  | -0.14 ± 0.08 |

|     |              |        |                  |
|-----|--------------|--------|------------------|
| Q38 | H $\alpha$   | 3.835  | 0.20 $\pm$ 0.03  |
| Q38 | N            | 117.71 | 1.8 $\pm$ 0.1    |
| A39 | C            | 179.28 | 0.0 $\pm$ 0.3    |
| A39 | C $\alpha$   | 54.96  | 0.0 $\pm$ 0.1    |
| A39 | C $\beta$    | 19.47  | 0.0 $\pm$ 0.1    |
| A39 | HN           | 8.117  | -0.14 $\pm$ 0.08 |
| A39 | H $\alpha$   | 3.652  | 0.17 $\pm$ 0.02  |
| A39 | H $\beta$    | 0.817  | 0.00 $\pm$ 0.02  |
| A39 | N            | 122.17 | -0.2 $\pm$ 0.1   |
| M40 | C            | 177.28 | 1.3 $\pm$ 0.1    |
| M40 | C $\alpha$   | 59.15  | -2.7 $\pm$ 0.1   |
| M40 | C $\beta$    | 31.43  | 0.0 $\pm$ 0.3    |
| M40 | C $\epsilon$ | 16.99  | -0.6 $\pm$ 0.1   |
| M40 | HN           | 8.397  | -0.45 $\pm$ 0.01 |
| M40 | H $\alpha$   | 3.040  | 0.74 $\pm$ 0.01  |
| M40 | H $\epsilon$ | 2.010  | -0.50 $\pm$ 0.01 |
| M40 | N            | 116.35 | -1.9 $\pm$ 0.1   |
| K41 | C            | 178.26 | 0.3 $\pm$ 0.1    |
| K41 | C $\alpha$   | 58.85  | -0.3 $\pm$ 0.1   |
| K41 | C $\beta$    | 32.38  | 0.0 $\pm$ 0.1    |
| K41 | HN           | 6.764  | 0.47 $\pm$ 0.01  |
| K41 | H $\alpha$   | 3.702  | 0.23 $\pm$ 0.01  |
| K41 | N            | 114.10 | 3.2 $\pm$ 0.1    |
| M42 | C            | 178.00 | 0.3 $\pm$ 0.2    |
| M42 | C $\alpha$   | 57.95  | 0.0 $\pm$ 0.2    |
| M42 | C $\beta$    | 34.31  | -1.9 $\pm$ 0.4   |
| M42 | C $\epsilon$ | 17.34  | 0.0 $\pm$ 0.1    |
| M42 | HN           | 7.322  | 0.14 $\pm$ 0.09  |
| M42 | H $\alpha$   | 4.132  | 0.00 $\pm$ 0.02  |
| M42 | H $\epsilon$ | 2.159  | 0.00 $\pm$ 0.04  |
| M42 | N            | 113.94 | 0.8 $\pm$ 0.1    |
| I43 | C            | 175.84 | 0.9 $\pm$ 0.1    |
| I43 | C $\alpha$   | 62.11  | 0.0 $\pm$ 0.1    |
| I43 | C $\beta$    | 39.04  | 0.0 $\pm$ 0.2    |
| I43 | C $\gamma$ 2 | 16.87  | 0.0 $\pm$ 0.1    |
| I43 | C $\delta$   | 13.86  | 0.4 $\pm$ 0.1    |
| I43 | HN           | 7.101  | 0.30 $\pm$ 0.02  |
| I43 | H $\alpha$   | 4.350  | 0.04 $\pm$ 0.07  |
| I43 | H $\gamma$ 2 | 0.544  | -0.07 $\pm$ 0.02 |
| I43 | H $\delta$   | 0.696  | 0.00 $\pm$ 0.03  |
| I43 | N            | 108.94 | 1.7 $\pm$ 0.1    |
| I44 | C            | 174.51 | 0.6 $\pm$ 0.1    |
| I44 | C $\alpha$   | 63.12  | -0.4 $\pm$ 0.1   |
| I44 | C $\beta$    | 38.02  | 0.0 $\pm$ 0.1    |
| I44 | C $\gamma$ 2 | 15.73  | 0.9 $\pm$ 0.1    |
| I44 | C $\delta$   | 14.69  | 0.3 $\pm$ 0.1    |
| I44 | HN           | 7.197  | -0.06 $\pm$ 0.01 |
| I44 | H $\alpha$   | 2.851  | 0.36 $\pm$ 0.02  |
| I44 | H $\gamma$ 2 | 0.635  | 0.00 $\pm$ 0.03  |
| I44 | H $\delta$   | 0.624  | 0.00 $\pm$ 0.11  |
| I44 | N            | 119.29 | 0.0 $\pm$ 0.1    |
| N45 | C            | 174.61 | 0.5 $\pm$ 0.1    |
| N45 | C $\alpha$   | 52.96  | -0.1 $\pm$ 0.1   |
| N45 | C $\beta$    | 38.27  | 0.0 $\pm$ 0.1    |
| N45 | HN           | 7.771  | -0.23 $\pm$ 0.09 |
| N45 | H $\alpha$   | 4.708  | 0.30 $\pm$ 0.01  |
| N45 | N            | 116.29 | 0.5 $\pm$ 0.1    |
| D46 | C $\alpha$   | 51.72  | 0.6 $\pm$ 0.2    |
| D46 | HN           | 7.677  | 0.31 $\pm$ 0.01  |
| D46 | H $\alpha$   | 4.976  | 0.10 $\pm$ 0.03  |
| D46 | N            | 123.25 | 1.6 $\pm$ 0.1    |

|     |     |        |              |
|-----|-----|--------|--------------|
| P47 | C   | 178.80 | -0.4 ± 0.1   |
| P47 | Ca  | 65.41  | -0.4 ± 0.1   |
| P47 | Cβ  | 32.69  | 0.0 ± 0.1    |
| P47 | Hα  | 4.515  | 0.22 ± 0.04  |
| R48 | C   | 177.22 | 0.8 ± 0.2    |
| R48 | Ca  | 57.87  | -0.4 ± 0.3   |
| R48 | Cβ  | 30.20  | -1.7 ± 0.4   |
| R48 | HN  | 9.778  | -0.30 ± 0.01 |
| R48 | Hα  | 3.962  | 0.42 ± 0.02  |
| R48 | N   | 115.95 | 1.6 ± 0.1    |
| Y49 | C   | 176.69 | 0.6 ± 0.1    |
| Y49 | Ca  | 61.37  | -0.4 ± 0.2   |
| Y49 | Cβ  | 38.52  | 0.0 ± 0.1    |
| Y49 | HN  | 8.452  | -0.17 ± 0.04 |
| Y49 | Hα  | 4.028  | 0.22 ± 0.01  |
| Y49 | N   | 121.70 | -3.4 ± 0.1   |
| S50 | C   | 173.92 | 2.8 ± 0.1    |
| S50 | Ca  | 58.06  | 3.7 ± 0.1    |
| S50 | Cβ  | 63.39  | -1.3 ± 0.1   |
| S50 | HN  | 7.291  | 0.50 ± 0.01  |
| S50 | Hα  | 4.326  | -0.36 ± 0.04 |
| S50 | N   | 108.01 | 5.2 ± 0.1    |
| A51 | C   | 176.80 | 2.7 ± 0.1    |
| A51 | Ca  | 54.39  | 0.5 ± 0.1    |
| A51 | Cβ  | 19.02  | 0.0 ± 0.1    |
| A51 | HN  | 7.513  | 0.28 ± 0.01  |
| A51 | Hα  | 3.379  | 0.94 ± 0.01  |
| A51 | Hβ  | 0.565  | 1.09 ± 0.01  |
| A51 | N   | 123.39 | -1.9 ± 0.1   |
| L52 | C   | 175.39 | 2.3 ± 0.1    |
| L52 | Ca  | 52.28  | 3.0 ± 0.1    |
| L52 | Cβ  | 43.25  | 0.0 ± 0.2    |
| L52 | Cδ1 | 26.13  | 0.6 ± 0.1    |
| L52 | Cδ2 | 23.11  | -0.4 ± 0.1   |
| L52 | HN  | 5.924  | 1.77 ± 0.01  |
| L52 | Hα  | 4.343  | 0.58 ± 0.02  |
| L52 | Hδ1 | 0.213  | 0.78 ± 0.01  |
| L52 | Hδ2 | 0.699  | -0.10 ± 0.03 |
| L52 | N   | 111.95 | 6.6 ± 0.1    |
| A53 | C   | 178.73 | 0.6 ± 0.1    |
| A53 | Ca  | 54.85  | 0.6 ± 0.1    |
| A53 | Cβ  | 20.07  | -1.7 ± 0.1   |
| A53 | HN  | 8.582  | -1.04 ± 0.01 |
| A53 | Hα  | 3.978  | -0.23 ± 0.02 |
| A53 | Hβ  | 1.497  | -0.12 ± 0.01 |
| A53 | N   | 125.61 | -2.9 ± 0.1   |
| K54 | C   | 177.46 | 0.8 ± 0.2    |
| K54 | Ca  | 55.46  | -0.7 ± 0.2   |
| K54 | Cβ  | 33.85  | -1.7 ± 0.2   |
| K54 | HN  | 7.953  | -0.16 ± 0.05 |
| K54 | Hα  | 4.432  | -0.08 ± 0.07 |
| K54 | N   | 115.28 | -1.0 ± 0.1   |
| L55 | C   | 178.14 | 0.8 ± 0.2    |
| L55 | Ca  | 58.49  | -3.0 ± 0.1   |
| L55 | Cβ  | 41.03  | 1.4 ± 0.3    |
| L55 | Cδ1 | 23.57  | -0.5 ± 0.2   |
| L55 | Cδ2 | 25.42  | 0.0 ± 0.1    |
| L55 | HN  | 8.979  | -1.41 ± 0.01 |
| L55 | Hα  | 3.695  | 0.60 ± 0.01  |
| L55 | Hδ1 | 1.042  | -0.44 ± 0.02 |
| L55 | Hδ2 | 1.027  | -0.65 ± 0.01 |

|     |    |        |              |
|-----|----|--------|--------------|
| L55 | N  | 127.78 | -5.6 ± 0.1   |
| S56 | C  | 177.34 | -2.2 ± 0.1   |
| S56 | Ca | 61.01  | -1.2 ± 0.1   |
| S56 | HN | 8.677  | -0.19 ± 0.09 |
| S56 | Ha | 3.801  | 0.61 ± 0.01  |
| S56 | N  | 112.05 | 12.0 ± 0.1   |
| E57 | C  | 179.17 | -2.6 ± 0.1   |
| E57 | Ca | 58.52  | -1.9 ± 0.1   |
| E57 | Cβ | 30.24  | -2.3 ± 0.1   |
| E57 | HN | 6.623  | 1.46 ± 0.01  |
| E57 | Ha | 3.967  | 0.48 ± 0.02  |
| E57 | N  | 121.59 | -3.6 ± 0.1   |
| K58 | C  | 177.96 | 0.0 ± 0.2    |
| K58 | Ca | 59.38  | 0.9 ± 0.1    |
| K58 | Cβ | 34.01  | -1.8 ± 0.6   |
| K58 | HN | 7.584  | 0.52 ± 0.02  |
| K58 | Ha | 2.968  | 0.40 ± 0.02  |
| K58 | N  | 121.38 | -2.5 ± 0.1   |
| K59 | C  | 179.03 | 0.5 ± 0.1    |
| K59 | Ca | 60.09  | 0.0 ± 0.2    |
| K59 | Cβ | 31.91  | 0.0 ± 0.1    |
| K59 | HN | 7.835  | 0.48 ± 0.01  |
| K59 | Ha | 3.447  | 0.35 ± 0.04  |
| K59 | N  | 116.45 | 3.1 ± 0.1    |
| Q60 | C  | 178.92 | 0.0 ± 0.2    |
| Q60 | Ca | 59.13  | 0.0 ± 0.1    |
| Q60 | Cβ | 28.41  | -0.5 ± 0.2   |
| Q60 | HN | 7.626  | 0.42 ± 0.01  |
| Q60 | Ha | 4.098  | 0.46 ± 0.02  |
| Q60 | N  | 119.05 | 0.6 ± 0.1    |
| A61 | C  | 180.28 | -1.5 ± 0.1   |
| A61 | Ca | 54.94  | 0.5 ± 0.2    |
| A61 | Cβ | 18.40  | 0.0 ± 0.1    |
| A61 | HN | 7.853  | -0.19 ± 0.11 |
| A61 | Ha | 4.243  | 0.14 ± 0.01  |
| A61 | Hβ | 1.514  | 0.12 ± 0.02  |
| A61 | N  | 123.09 | -0.1 ± 0.1   |
| F62 | C  | 176.27 | 0.3 ± 0.2    |
| F62 | Ca | 60.29  | 0.0 ± 0.2    |
| F62 | Cβ | 39.45  | 0.0 ± 0.1    |
| F62 | HN | 8.681  | -0.17 ± 0.05 |
| F62 | Ha | 4.640  | 0.18 ± 0.01  |
| F62 | N  | 120.13 | -0.6 ± 0.1   |
| N63 | C  | 177.60 | 0.4 ± 0.3    |
| N63 | Ca | 56.36  | 0.0 ± 0.1    |
| N63 | Cβ | 37.76  | 0.0 ± 0.1    |
| N63 | HN | 8.617  | -0.19 ± 0.01 |
| N63 | Ha | 4.103  | -0.10 ± 0.03 |
| N63 | N  | 118.95 | 0.4 ± 0.1    |
| A64 | C  | 179.65 | 0.3 ± 0.2    |
| A64 | Ca | 54.80  | 0.0 ± 0.1    |
| A64 | Cβ | 18.17  | 0.0 ± 0.1    |
| A64 | Ha | 4.145  | -0.14 ± 0.05 |
| A64 | Hβ | 1.564  | 0.01 ± 0.03  |
| Y65 | C  | 177.44 | 0.0 ± 0.2    |
| Y65 | Ca | 60.34  | 0.0 ± 0.2    |
| Y65 | Cβ | 38.91  | 0.0 ± 0.1    |
| Y65 | HN | 8.080  | -0.29 ± 0.09 |
| Y65 | Ha | 4.239  | 0.16 ± 0.02  |
| Y65 | N  | 120.83 | 0.0 ± 0.2    |
| K66 | C  | 177.84 | 0.3 ± 0.2    |

|     |     |        |              |
|-----|-----|--------|--------------|
| K66 | Ca  | 60.01  | 0.0 ± 0.1    |
| K66 | Cβ  | 32.04  | 0.0 ± 0.1    |
| K66 | HN  | 8.000  | -0.20 ± 0.01 |
| K66 | Ha  | 3.492  | 0.21 ± 0.01  |
| K66 | N   | 119.09 | -0.1 ± 0.1   |
| V67 | C   | 177.14 | 0.0 ± 0.1    |
| V67 | Ca  | 63.41  | -0.2 ± 0.1   |
| V67 | Cβ  | 31.90  | 0.0 ± 0.1    |
| V67 | Cγ1 | 21.31  | 0.0 ± 0.1    |
| V67 | Cγ2 | 20.91  | 0.0 ± 0.1    |
| V67 | HN  | 7.249  | -0.14 ± 0.01 |
| V67 | Ha  | 4.004  | 0.22 ± 0.03  |
| V67 | Hγ1 | 0.971  | -0.07 ± 0.01 |
| V67 | Hγ2 | 1.043  | 0.00 ± 0.07  |
| V67 | N   | 114.19 | 1.3 ± 0.1    |
| Q68 | C   | 176.53 | -0.4 ± 0.3   |
| Q68 | Ca  | 56.59  | 0.4 ± 0.1    |
| Q68 | Cβ  | 28.87  | 0.0 ± 0.1    |
| Q68 | HN  | 7.682  | -0.14 ± 0.01 |
| Q68 | Ha  | 4.256  | -0.13 ± 0.03 |
| Q68 | N   | 120.45 | -0.5 ± 0.2   |
| T69 | C   | 174.62 | 0.2 ± 0.1    |
| T69 | Ca  | 62.53  | 0.3 ± 0.1    |
| T69 | Cβ  | 69.53  | 0.0 ± 0.1    |
| T69 | Cγ2 | 21.55  | 0.0 ± 0.1    |
| T69 | HN  | 7.847  | -0.16 ± 0.08 |
| T69 | Ha  | 4.179  | 0.00 ± 0.04  |
| T69 | Hγ2 | 1.110  | 0.02 ± 0.02  |
| T69 | N   | 113.91 | 0.3 ± 0.1    |
| E70 | C   | 175.47 | 0.0 ± 0.1    |
| E70 | Ca  | 56.75  | -0.2 ± 0.1   |
| E70 | Cβ  | 30.09  | 0.0 ± 0.1    |
| E70 | HN  | 8.075  | -0.19 ± 0.06 |
| E70 | Ha  | 4.262  | 0.08 ± 0.03  |
| E70 | N   | 123.26 | -0.4 ± 0.1   |
| K71 | Ca  | 57.58  | 0.2 ± 0.1    |
| K71 | HN  | 7.856  | -0.14 ± 0.08 |
| K71 | Ha  | 4.128  | 0.11 ± 0.05  |
| K71 | N   | 127.07 | 0.1 ± 0.1    |

| Sample No | Protein Labelling    | Buffer                                                                                                      | Temperature (°C) | Experimental Parameters |               | Fitted Parameters         |                           |                            |                           |              |              |             | Comments                                                                                                                             |
|-----------|----------------------|-------------------------------------------------------------------------------------------------------------|------------------|-------------------------|---------------|---------------------------|---------------------------|----------------------------|---------------------------|--------------|--------------|-------------|--------------------------------------------------------------------------------------------------------------------------------------|
|           |                      |                                                                                                             |                  | $B_1$ (Hz)              | $T_{EX}$ (ms) | $k_{ex,FI1}$ ( $s^{-1}$ ) | $k_{ex,FI2}$ ( $s^{-1}$ ) | $k_{ex,I1I2}$ ( $s^{-1}$ ) | $k_{ex,I1U}$ ( $s^{-1}$ ) | $p_{I1}$ (%) | $p_{I2}$ (%) | $p_U$ (%)   |                                                                                                                                      |
| 6         | [U- <sup>15</sup> N] | 50mM Sodium acetate, 100mM NaCl, 2mM EDTA, 2mM NaN <sub>3</sub> , 10% D <sub>2</sub> O, pH 5.7              | 10               | 26                      | 450           |                           |                           |                            |                           |              |              |             | Data from residues T13, K26, K28, R29, N33, E37, K41, M42, I43, S50, L52, L55, and S56 was used.                                     |
|           |                      |                                                                                                             |                  | 52.1                    | 400           | 784 ± 67                  | 406 ± 5                   | 1600 ± 113                 | 11000 ± 1064              | 0.27 ± 0.01  | 0.83 ± 0.01  | 0.16 ± 0.02 |                                                                                                                                      |
|           |                      |                                                                                                             |                  | 104.1                   | 350           |                           |                           |                            |                           |              |              |             |                                                                                                                                      |
|           |                      |                                                                                                             |                  | 208.3                   | 350           |                           |                           |                            |                           |              |              |             |                                                                                                                                      |
| 6         | [U- <sup>15</sup> N] | 50mM Sodium acetate, 100mM NaCl, 2mM EDTA, 2mM NaN <sub>3</sub> , 10% D <sub>2</sub> O, pH 5.7              | 10               | 26                      | 450           |                           |                           |                            |                           |              |              |             |                                                                                                                                      |
|           |                      |                                                                                                             |                  | 51.7                    | 400           | 372 ± 21                  | 216 ± 3                   | 886 ± 39                   | 8370 ± 610                | 0.13 ± 0.01  | 0.55 ± 0.01  | 0.11 ± 0.01 |                                                                                                                                      |
|           |                      |                                                                                                             |                  | 103.5                   | 350           |                           |                           |                            |                           |              |              |             |                                                                                                                                      |
|           |                      |                                                                                                             |                  | 207                     | 350           |                           |                           |                            |                           |              |              |             |                                                                                                                                      |
| 7         | [U- <sup>15</sup> N] | 50mM Sodium acetate, 100mM NaCl, 2mM EDTA, 2mM NaN <sub>3</sub> , 0.25 M urea, 10% D <sub>2</sub> O, pH 5.7 | 10               | 26                      | 450           |                           |                           |                            |                           |              |              |             |                                                                                                                                      |
|           |                      |                                                                                                             |                  | 51.9                    | 400           | 385 ± 16                  | 225 ± 2                   | 836 ± 30                   | 8890 ± 462                | 0.19 ± 0.01  | 0.52 ± 0.01  | 0.25 ± 0.01 |                                                                                                                                      |
|           |                      |                                                                                                             |                  | 103.7                   | 350           |                           |                           |                            |                           |              |              |             |                                                                                                                                      |
|           |                      |                                                                                                             |                  | 207.4                   | 350           |                           |                           |                            |                           |              |              |             |                                                                                                                                      |
| 8         | [U- <sup>15</sup> N] | 50mM Sodium acetate, 100mM NaCl, 2mM EDTA, 2mM NaN <sub>3</sub> , 0.50 M urea, 10% D <sub>2</sub> O, pH 5.7 | 2.5              | 26                      | 450           |                           |                           |                            |                           |              |              |             | For <i>m</i> -value analysis<br><br>Data from residues T13, K26, K28, R29, N33, E37, K41, M42, I43, S50, L52, L55, and S56 was used. |
|           |                      |                                                                                                             |                  | 52                      | 400           | 371 ± 15                  | 236 ± 3                   | 828 ± 26                   | 9490 ± 351                | 0.25 ± 0.01  | 0.52 ± 0.01  | 0.52 ± 0.01 |                                                                                                                                      |
|           |                      |                                                                                                             |                  | 104.1                   | 350           |                           |                           |                            |                           |              |              |             |                                                                                                                                      |
|           |                      |                                                                                                             |                  | 208.2                   | 350           |                           |                           |                            |                           |              |              |             |                                                                                                                                      |
| 9         | [U- <sup>15</sup> N] | 50mM Sodium acetate, 100mM NaCl, 2mM EDTA, 2mM NaN <sub>3</sub> , 0.75 M urea, 10% D <sub>2</sub> O, pH 5.7 | 10               | 26                      | 450           |                           |                           |                            |                           |              |              |             |                                                                                                                                      |
|           |                      |                                                                                                             |                  | 51.9                    | 400           | 345 ± 16                  | 249 ± 3                   | 853 ± 27                   | 9510 ± 346                | 0.34 ± 0.01  | 0.51 ± 0.01  | 1.11 ± 0.02 |                                                                                                                                      |
|           |                      |                                                                                                             |                  | 103.8                   | 350           |                           |                           |                            |                           |              |              |             |                                                                                                                                      |
|           |                      |                                                                                                             |                  | 207.5                   | 350           |                           |                           |                            |                           |              |              |             |                                                                                                                                      |
| 10        | [U- <sup>15</sup> N] | 50mM Sodium acetate, 100mM NaCl, 2mM EDTA, 2mM NaN <sub>3</sub> , 1.0 M Urea, 10% D <sub>2</sub> O, pH 5.7  | 10               | 26                      | 450           |                           |                           |                            |                           |              |              |             |                                                                                                                                      |
|           |                      |                                                                                                             |                  | 52.2                    | 400           | 322 ± 18                  | 256 ± 4                   | 885 ± 30                   | 9290 ± 370                | 0.43 ± 0.02  | 0.51 ± 0.01  | 2.06 ± 0.03 |                                                                                                                                      |
|           |                      |                                                                                                             |                  | 104.3                   | 350           |                           |                           |                            |                           |              |              |             |                                                                                                                                      |
|           |                      |                                                                                                             |                  | 208.6                   | 350           |                           |                           |                            |                           |              |              |             |                                                                                                                                      |

**Table S4.** Four-state exchange parameters obtained by analysing A17G FF <sup>15</sup>N CEST data under different conditions. Sample numbers are from Table S1.

**Legend for supplementary file A17GFF\_I2\_lowest10.pdb.** This file contains the coordinates of the ten lowest energy A17G FF I2 state structures obtained using the CS-ROSETTA program (41) as described in the Materials and Methods section of the *SI Appendix*.



## References

1. J. Cavanagh, W. J. Fairbrother, A. G. Palmer, M. Rance, N. J. Skelton, *Protein NMR Spectroscopy, Principles and Practice* (Academic Press, ed. 2nd 2006).
2. S. Forsen, R. A. Hoffman, Study of Moderately Rapid Chemical Exchange Reactions by Means of Nuclear Magnetic Double Resonance. *J Chem Phys* **39**, 2892-2901 (1963).
3. K. M. Ward, A. H. Aletras, R. S. Balaban, A new class of contrast agents for MRI based on proton chemical exchange dependent saturation transfer (CEST). *J Magn Reson* **143**, 79-87 (2000).
4. P. Vallurupalli, G. Bouvignies, L. E. Kay, Studying "invisible" excited protein States in slow exchange with a major state conformation. *J Am Chem Soc* **134**, 8148-8161 (2012).
5. P. Vallurupalli, A. Sekhar, T. Yuwen, L. E. Kay, Probing conformational dynamics in biomolecules via chemical exchange saturation transfer: a primer. *J Biomol NMR* **67**, 243-271 (2017).
6. N. P. Khandave, D. F. Hansen, P. Vallurupalli, Increasing the accuracy of exchange parameters reporting on slow dynamics by performing CEST experiments with 'high' B(1) fields. *J Magn Reson* **363**, 107699 (2024).
7. N. P. Khandave, A. Sekhar, P. Vallurupalli, Studying micro to millisecond protein dynamics using simple amide (15)N CEST experiments supplemented with major-state R(2) and visible peak-position constraints. *J Biomol NMR* 10.1007/s10858-023-00419-2 (2023).
8. A. Rangadurai, E. S. Szymaski, I. J. Kimsey, H. Shi, H. Al-Hashimi, Characterizing micro-to-millisecond chemical exchange in nucleic acids using off-resonance R1ρ relaxation dispersion. *Progress in Nuclear Magnetic Resonance Spectroscopy* **112-113**, 55-102 (2019).
9. T. Yuwen, L. E. Kay, G. Bouvignies, Dramatic Decrease in CEST Measurement Times Using Multi-Site Excitation. *Chemphyschem* **19**, 1707-1710 (2018).
10. V. P. Tiwari, D. De, N. Thapliyal, L. E. Kay, P. Vallurupalli, Beyond slow two-state protein conformational exchange using CEST: applications to three-state protein interconversion on the millisecond timescale. *J Biomol NMR* 10.1007/s10858-023-00431-6 (2024).
11. V. P. Tiwari, Y. Toyama, D. De, L. E. Kay, P. Vallurupalli, The A39G FF domain folds on a volcano-shaped free energy surface via separate pathways. *Proc Natl Acad Sci U S A* **118** (2021).
12. P. Lundstrom, P. Vallurupalli, D. F. Hansen, L. E. Kay, Isotope labeling methods for studies of excited protein states by relaxation dispersion NMR spectroscopy. *Nat Protoc* **4**, 1641-1648 (2009).
13. N. K. Goto, K. H. Gardner, G. A. Mueller, R. C. Willis, L. E. Kay, A robust and cost-effective method for the production of Val, Leu, Ile (delta 1) methyl-protonated 15N-, 13C-, 2H-labeled proteins. *J Biomol NMR* **13**, 369-374 (1999).
14. D. F. Hansen, P. Vallurupalli, P. Lundstrom, P. Neudecker, L. E. Kay, Probing chemical shifts of invisible states of proteins with relaxation dispersion NMR spectroscopy: how well can we do? *J Am Chem Soc* **130**, 2667-2675 (2008).
15. V. P. Tiwari, P. Vallurupalli, A CEST NMR experiment to obtain glycine (1)H(alpha) chemical shifts in 'invisible' minor states of proteins. *J Biomol NMR* **74**, 443-455 (2020).

16. P. Vallurupalli, D. F. Hansen, P. Lundstrom, L. E. Kay, CPMG relaxation dispersion NMR experiments measuring glycine  $^1\text{H}$   $\alpha$  and  $^{13}\text{C}$   $\alpha$  chemical shifts in the 'invisible' excited states of proteins. *J Biomol NMR* **45**, 45-55 (2009).
17. G. Bouvignies, P. Vallurupalli, L. E. Kay, Visualizing Side Chains of Invisible Protein Conformers by Solution NMR. *Journal of Molecular Biology* **426**, 763-774 (2014).
18. P. Vallurupalli, G. Bouvignies, L. E. Kay, A Computational Study of the Effects of C-13-C-13 Scalar Couplings on C-13 CEST NMR Spectra: Towards Studies on a Uniformly C-13-Labeled Protein. *Chembiochem* **14**, 1709-1713 (2013).
19. N. R. Skrynnikov, F. W. Dahlquist, L. E. Kay, Reconstructing NMR spectra of "invisible" excited protein states using HSQC and HMQC experiments. *J Am Chem Soc* **124**, 12352-12360 (2002).
20. R. Auer *et al.*, Measuring the signs of  $^1\text{H}$ ( $\alpha$ ) chemical shift differences between ground and excited protein states by off-resonance spin-lock R( $1\rho$ ) NMR spectroscopy. *J Am Chem Soc* **131**, 10832-10833 (2009).
21. A. B. Gopalan, P. Vallurupalli, Measuring the signs of the methyl  $^1\text{H}$  chemical shift differences between major and 'invisible' minor protein conformational states using methyl  $^1\text{H}$  multi-quantum spectroscopy. *J Biomol NMR* **70**, 187-202 (2018).
22. T. Yuwen, L. E. Kay, A new class of CEST experiment based on selecting different magnetization components at the start and end of the CEST relaxation element: an application to ( $^1\text{H}$ ) CEST. *J Biomol NMR* **70**, 93-102 (2018).
23. T. Yuwen, A. Sekhar, L. E. Kay, Separating dipolar and chemical exchange magnetization transfer processes in  $^1\text{H}$ -CEST. *Angew Chem Int Ed Engl* **56**, 6122-6125 (2017).
24. P. Vallurupalli, L. E. Kay, Probing slow chemical exchange at carbonyl sites in proteins by chemical exchange saturation transfer NMR spectroscopy. *Angew Chem Int Ed Engl* **52**, 4156-4159 (2013).
25. D. Long, A. Sekhar, L. E. Kay, Triple resonance-based ( $^1$ )( $^3$ )C( $\alpha$ ) and ( $^1$ )( $^3$ )C( $\beta$ ) CEST experiments for studies of ms timescale dynamics in proteins. *J Biomol NMR* **60**, 203-208 (2014).
26. A. Kumar, K. Madhurima, A. N. Naganathan, P. Vallurupalli, A. Sekhar, Probing excited state ( $^1\text{H}$ ) $\alpha$  chemical shifts in intrinsically disordered proteins with a triple resonance-based CEST experiment: Application to a disorder-to-order switch. *Methods* **218**, 198-209 (2023).
27. G. Bouvignies, L. E. Kay, A 2D ( $^1$ )( $^3$ )C-CEST experiment for studying slowly exchanging protein systems using methyl probes: an application to protein folding. *J Biomol NMR* **53**, 303-310 (2012).
28. T. Yuwen, G. Bouvignies, L. E. Kay, Exploring methods to expedite the recording of CEST datasets using selective pulse excitation. *J Magn Reson* **292**, 1-7 (2018).
29. K. H. Gardner, R. Konrat, M. K. Rosen, L. E. Kay, An ( $^1\text{H}$ )C(CO)NH-TOCSY pulse scheme for sequential assignment of protonated methyl groups in otherwise deuterated ( $^{15}\text{N}$ ), ( $^{13}\text{C}$ )-labeled proteins. *J Biomol NMR* **8**, 351-356 (1996).
30. M. Sattler, J. Schleucher, C. Griesinger, Heteronuclear multidimensional NMR experiments for the structure determination of proteins in solution employing pulsed field gradients. *Progress in Nuclear Magnetic Resonance Spectroscopy* **34**, 93-158 (1999).
31. M. Ikura, L. E. Kay, A. Bax, A novel approach for sequential assignment of  $^1\text{H}$ ,  $^{13}\text{C}$ , and  $^{15}\text{N}$  spectra of proteins: heteronuclear triple-resonance three-dimensional NMR spectroscopy. Application to calmodulin. *Biochemistry* **29**, 4659-4667 (1990).

32. F. Delaglio *et al.*, NMRPipe - a Multidimensional Spectral Processing System Based on Unix Pipes. *J Biomol NMR* **6**, 277-293 (1995).
33. T. D. Goddard, D. G. Kneller, *SPARKY 3 University of California, San Francisco* (2008).
34. W. Lee, M. Tonelli, J. L. Markley, NMRFAM-SPARKY: enhanced software for biomolecular NMR spectroscopy. *Bioinformatics* **31**, 1325-1327 (2015).
35. A. Ahlner, M. Carlsson, B. H. Jonsson, P. Lundstrom, PINT: a software for integration of peak volumes and extraction of relaxation rates. *J Biomol NMR* **56**, 191-202 (2013).
36. Y. Shen, A. Bax, Protein backbone and sidechain torsion angles predicted from NMR chemical shifts using artificial neural networks. *J Biomol NMR* **56**, 227-241 (2013).
37. M. V. Berjanskii, D. S. Wishart, A simple method to predict protein flexibility using secondary chemical shifts. *J Am Chem Soc* **127**, 14970-14971 (2005).
38. G. Bouvignies, *Chemex* (<https://github.com/gbouvignies/chemex/releases>) (2012).
39. H. M. McConnell, Reaction Rates by Nuclear Magnetic Resonance. *J Chem Phys* **28**, 430-431 (1958).
40. W. H. Press, B. P. Flannery, S. A. Teukolsky, W. T. Vetterling, *Numerical Recipes in C. The Art of Scientific Computing* (Cambridge University Press, Cambridge (UK), ed. Second Edition, 1992).
41. Y. Shen *et al.*, Consistent blind protein structure generation from NMR chemical shift data. *Proc Natl Acad Sci U S A* **105**, 4685-4690 (2008).
42. A. Cavalli, X. Salvatella, C. M. Dobson, M. Vendruscolo, Protein structure determination from NMR chemical shifts. *Proceedings of the National Academy of Sciences of the United States of America* **104**, 9615-9620 (2007).
43. D. S. Wishart *et al.*, CS23D: a web server for rapid protein structure generation using NMR chemical shifts and sequence data. *Nucleic Acids Research* **36**, W496-W502 (2008).
44. M. Allen, A. Friedler, O. Schon, M. Bycroft, The structure of an FF domain from human HYPB/GBP1. *Journal of Molecular Biology* **323**, 411-416 (2002).
45. M. W. Maciejewski *et al.*, NMRbox: A Resource for Biomolecular NMR Computation. *Biophys J* **112**, 1529-1534 (2017).
46. E. F. Pettersen *et al.*, UCSF Chimera--a visualization system for exploratory research and analysis. *J Comput Chem* **25**, 1605-1612 (2004).
47. R. Bonet, L. Ruiz, E. Aragon, P. Martin-Malpartida, M. J. Macias, NMR structural studies on human p190-A RhoGAPFF1 revealed that domain phosphorylation by the PDGF-receptor alpha requires its previous unfolding. *J Mol Biol* **389**, 230-237 (2009).
